1 **Structure of human ferroportin bound to hepcidin reveals mechanisms of iron**  
2 **homeostasis**

3

4 Christian B. Billesbølle<sup>1\*</sup>, Caleigh M. Azumaya<sup>2\*</sup>, Rachael C. Kretsch<sup>3-7</sup>, Alexander S.  
5 Powers<sup>3-6,8</sup>, Shane Gonen<sup>2,9,10</sup>, Simon Schneider<sup>11</sup>, Tara Arvedson<sup>12</sup>, Ron O. Dror<sup>3-7</sup>, Yifan  
6 Cheng<sup>2,9</sup>, Aashish Manglik<sup>1,13</sup>

7

8 <sup>1</sup>Department of Pharmaceutical Chemistry, University of California, San Francisco, 1700 4th  
9 Street, San Francisco, CA 94158, USA.

10 <sup>2</sup>Department of Biochemistry and Biophysics, University of California, San Francisco, 600 16th  
11 Street, San Francisco, CA 94158, USA.

12 <sup>3</sup>Department of Computer Science, Stanford University, Stanford, CA 94305, USA

13 <sup>4</sup>Department of Molecular and Cellular Physiology, Stanford University School of Medicine,  
14 Stanford, CA 94305, USA

15 <sup>5</sup>Department of Structural Biology, Stanford University School of Medicine, Stanford, CA 94305,  
16 USA

17 <sup>6</sup>Institute for Computational and Mathematical Engineering, Stanford University, Stanford, CA  
18 94305, USA

19 <sup>7</sup>Biophysics Program, Stanford University, Stanford, CA 94305, USA

20 <sup>8</sup>Department of Chemistry, Stanford University, Stanford, CA 94305, USA

21 <sup>9</sup>Howard Hughes Medical Institute, University of California San Francisco, San Francisco, CA,  
22 USA

23 <sup>10</sup>Present address: Department of Molecular Biology and Biochemistry, University of California,  
24 Irvine, 2224 Biological Sciences III, Irvine, CA 92697, USA

25 <sup>11</sup>Institute of Biochemistry, Goethe University Frankfurt, Max-von-Laue-Straße 9, 60438  
26 Frankfurt am Main, Germany

27 <sup>12</sup>Department of Oncology Research, Amgen Inc., South San Francisco, CA, United States

28 <sup>13</sup>Department of Anesthesia and Perioperative Care, University of California, San Francisco,  
29 1700 4th Street, San Francisco, CA 94158, USA.

30

31 \* These authors contributed equally

32 Correspondence to Yifan Cheng (Yifan.Cheng@ucsf.edu) or Aashish Manglik  
33 (Aashish.Manglik@ucsf.edu)

34

35

## 36 **Abstract**

37 The serum iron level in humans is tightly controlled by the action of the hormone hepcidin on the  
38 iron efflux transporter ferroportin. Hepcidin negatively regulates iron absorption and recycling by  
39 inducing ferroportin internalization and degradation. Aberrant ferroportin activity can lead to  
40 diseases of iron overload, like hemochromatosis, or iron limitation anemias. Here, we  
41 determined cryogenic electron microscopy (cryo-EM) structures of ferroportin in lipid nanodiscs,  
42 both in the apo state and in complex with cobalt, an iron mimetic, and hepcidin. These  
43 structures and accompanying molecular dynamics simulations identify two divalent metal  
44 binding sites within the N- and C-domains of ferroportin. Hepcidin binds ferroportin in an  
45 outward-open conformation and completely occludes the iron efflux pathway. The  
46 carboxy-terminus of hepcidin directly contacts the divalent metal in the FPN C-domain. We  
47 further show that hepcidin binding to ferroportin is coupled to iron binding, with an 80-fold  
48 increase in hepcidin affinity in the presence of iron. These results suggest a new model for  
49 hepcidin regulation of ferroportin, where only iron loaded ferroportin molecules are targeted for  
50 degradation. More broadly, our structural and functional insights are likely to enable more  
51 targeted manipulation of the hepcidin-ferroportin axis in disorders of iron homeostasis.

## 52 Introduction

53 Iron is essential for life. Complexed to heme, iron enables oxygen transport and cellular  
54 respiration. As a cofactor for many proteins, iron coordinates redox chemistry by alternating  
55 between ferrous ( $\text{Fe}^{2+}$ ) and ferric ( $\text{Fe}^{3+}$ ) oxidation states. Despite this central role in biology, free  
56 ferrous iron is toxic. In excess, iron can catalyze the production of free radicals, leading to  
57 cellular damage. Iron levels are therefore tightly controlled, both at the cellular and organism  
58 level.

59

60 In mammals, iron levels are regulated by the action of hepcidin, a peptide hormone, on  
61 ferroportin (FPN), the only known iron efflux transporter<sup>1-3</sup> (Fig. 1a). FPN mediates absorbance  
62 of dietary iron by transport of ferrous iron across the basolateral surface of intestinal  
63 enterocytes. FPN also mediates iron recycling from hepatocytes and macrophages<sup>4</sup>. Iron efflux  
64 by FPN is controlled by the amount of transporter located at the cellular surface. FPN synthesis  
65 is transcriptionally regulated by cellular hypoxia, iron and heme concentrations, and  
66 inflammatory signaling<sup>5</sup>. In settings of elevated serum iron levels, liver-derived hepcidin levels  
67 increase and this hepcidin negatively regulates cell surface FPN by acutely blocking iron  
68 transport<sup>6</sup> and inducing FPN ubiquitination, internalization, and degradation<sup>7-10</sup>. Hepcidin  
69 activity decreases serum iron levels by suppressing FPN-mediated dietary iron absorption and  
70 release of iron from cellular stores.

71

72 Iron disorders in humans can result from dysregulation of hepcidin or FPN, reflecting the central  
73 role of the hepcidin-FPN axis in iron homeostasis. Deficits in hepcidin-mediated regulation of  
74 FPN, often due to hereditary hemochromatoses, lead to iron overload and widespread tissue  
75 damage affecting the liver, pancreas, and joints<sup>11-13</sup>. By contrast, inappropriate elevation of  
76 hepcidin levels yields iron-restricted anemia<sup>14,15</sup>. Although several approaches to restore  
77 aberrant FPN function have been evaluated in clinical trials<sup>16-18</sup>, none have thus far succeeded.

78

79 The molecular mechanism of FPN regulation by hepcidin remains incompletely defined at the  
80 atomic level. A confluence of human genetics studies and structure-function evaluations have  
81 identified key regions of FPN important in hepcidin regulation<sup>6,19-22</sup>. A key recent advance was  
82 determination of the X-ray crystal structure of a divalent metal transporter from the bacterium  
83 *Bdellovibrio bacteriovorus* (bbFPN) with 40% similarity to human FPN<sup>23,24</sup>, which revealed a  
84 unique architecture among the broader major facilitator superfamily (MFS) of membrane

85 transporters. Although bbFPN is predicted to share structural features with human FPN, the  
86 precise mechanisms of iron coordination likely differ and bbFPN is not regulated by hepcidin.  
87

88 To understand how FPN transports iron, and how this process is regulated by hepcidin, we used  
89 a combination of cryogenic electron-microscopy (cryo-EM), molecular dynamics simulations,  
90 and *in vitro* biochemical assays. These studies reveal the molecular recognition of iron and  
91 hepcidin by FPN and suggest a new regulatory mechanism enabling hepcidin to selectively  
92 target actively transporting ferroportin molecules for degradation.

93

#### 94 **Structures of apo- and hepcidin-bound human FPN**

95 We screened the antigen-binding fragments (Fabs) of antibodies previously raised against  
96 FPN<sup>25</sup> for use as a fiducial mark to guide image alignment of a small membrane protein  
97 embedded in a lipid nanodisc for structure determination by single particle cryo-EM, a strategy  
98 we proposed many years ago<sup>26</sup>. Among the many Fabs that bound purified FPN  
99 (Supplementary Fig. 1), a single clone, Fab45D8, yielded interpretable class averages in  
100 negative stain EM and was selected to facilitate cryo-EM structure determination. Unlike many  
101 antibodies and antibody fragments targeting FPN, Fab45D8 was previously determined to be  
102 non-competitive with hepcidin and, on its own, did not induce FPN internalization<sup>25</sup>. Indeed, in  
103 nanodisc-reconstituted preparations of FPN, Fab45D8 did not alter the binding properties of  
104 hepcidin (Supplementary Fig. 2).

105

106 We determined cryo-EM structures of nanodisc-reconstituted FPN bound to Fab45D8, both in  
107 the apo state (3.2 Å, Supplementary Fig. 3) and bound to hepcidin and Co<sup>2+</sup> (2.5 Å,  
108 Supplementary Fig. 4). We independently validated prior reports that FPN transports cobalt<sup>27</sup>  
109 (Supplementary Fig. 1). Unlike Fe<sup>2+</sup>, Co<sup>2+</sup> is not readily oxidized and therefore provides a  
110 tractable surrogate divalent metal for FPN biochemical and structural studies. The cryo-EM  
111 density map of FPN enabled building of an atomic model of FPN regions important for iron  
112 transport and hepcidin binding<sup>1,6</sup>, and a portion of the intracellular loop 3 (ICL3) important in  
113 hepcidin-induced FPN internalization<sup>8-10</sup> (Supplementary Fig. 3 and 5a & Supplementary Table  
114 1). The entire FPN extracellular loop 5 (ECL5) remains unresolved, likely due to significant  
115 conformational flexibility. To enable modeling of Fab45D8, we separately obtained its X-ray  
116 crystal structure at 2.1 Å (Supplementary Fig. 6 and Supplementary Table 2)

117



118 Both cryo-EM structures reveal a monomeric FPN bound to a single Fab45D8 molecule, which  
119 recognizes a short alpha helical segment in FPN extracellular loop 2 (ECL2) (Fig. 1b and  
120 Supplementary Fig. 6). Similar to other MFS transporters, FPN contains twelve transmembrane  
121 (TM) helices arranged in two domains (Fig. 2a). Both the N-terminal and C-terminal domains are  
122 composed of six helices, with a large central cavity that, in both apo- and hepcidin-bound  
123 structures, is open to the extracellular side and closed intracellularly (Fig. 2b). Ferroportin  
124 shares significant structural similarity with the bacterial bbFPN transporter, with an overall root  
125 mean squared deviation (RMSD) of 2.0 Å when compared to the outward-open conformation of  
126 bbFPN (Fig. 2c). The overall backbone conservation is even higher within the isolated  
127 C-terminal domain (RMSD 1.4 Å). Unlike most other MFS transporters, the alpha helix of FPN  
128 TM7 is interrupted by a short non-helical stretch of six residues. This unique feature, previously  
129 posited to be important in iron binding<sup>24</sup>, is shared between FPN and bbFPN.

130

131 Several interacting residues define an intracellular gate that keeps the N- and C- domains of  
132 FPN in an outward open conformation. Similar to a previously observed interaction network in  
133 bbFPN<sup>23</sup>, R489 in TM11 of the C-domain forms an ionic interaction with D157 in TM4 of the  
134 N-domain (Fig. 2d). This interaction is further supported by an extended ionic and  
135 hydrogen-bonding network including residues E486 (TM11) and R88 (TM3). In FPN, an  
136 additional cluster of ionic and hydrogen bonding interactions between TM5 in the N-domain and  
137 TM10 in the C-domain further stabilizes the outward open conformation (Fig. 2e). Mutation of  
138 several residues within the intracellular gate leads to FPN loss of function in ferroportin disease,  
139 highlighting the importance of the gate in coordinating the conformational steps necessary for  
140 iron efflux<sup>19,28</sup>.

141

#### 142 **Iron binds to the N and C domains of FPN**

143 Two distinct sites capable of binding divalent cations have previously been proposed for bbFPN.  
144 Although initial crystallographic studies suggested that iron primarily binds in a cavity within the  
145 N domain of the bbFPN transporter<sup>23</sup>, further mutagenesis studies found a critical divalent cation  
146 binding site within the C domain<sup>24</sup>. Structural elucidation of the FPN iron binding site, however,  
147 remains elusive. Previous studies on bbFPN either used supraphysiological concentrations of  
148 iron or found Ni<sup>2+</sup> bound as an EDTA complex.

149

150 We obtained cryo-EM data for a  $\text{Co}^{2+}$ -hepcidin-FPN complex in the presence of a 8-fold molar  
151 excess of  $\text{CoCl}_2$  to FPN ( $100 \mu\text{M CoCl}_2$ : $12.5 \mu\text{M FPN}$ ) to minimize artifacts arising from  
152 supraphysiological metal concentrations. Comparison of this map with the apo-FPN map  
153 revealed two new densities in the central cavity of FPN, corresponding to single metal binding  
154 sites in the N and in the C domain respectively (Fig. 3a-c). Within the C domain,  $\text{Co}^{2+}$  directly  
155 interacts with C326 in TM7b and H507 in TM11 while making a water-mediated contact with  
156 D325 and the backbone carbonyl of T320 (Fig. 3b). Intriguingly, the tetrahedral coordination  
157 geometry for  $\text{Co}^{2+}$  is fulfilled by the carboxy terminus of hepcidin. Within the N domain, we  
158 observe density for  $\text{Co}^{2+}$  coordinated directly by TM1 residues D39 and H43 (Fig. 3c).

159

160 We captured  $\text{Co}^{2+}$  bound to FPN in the presence of hepcidin. Hepcidin binding likely influences  
161 the structure and dynamics of FPN and it is therefore possible that the metal binding sites are  
162 different in FPN in the absence of hepcidin. To better understand divalent metal binding to FPN  
163 in the absence of hepcidin, we used all-atom molecular dynamics simulations. We first  
164 performed six simulations of apo-FPN in a hydrated lipid bilayer with  $\text{Fe}^{2+}$  ions initially positioned  
165 randomly in bulk solvent. In all six independent simulations,  $\text{Fe}^{2+}$  ions bound spontaneously to  
166 the C domain, localizing to the unwound region of TM7 near residues D325, D504, and H507  
167 within hundreds of nanoseconds of simulation time (Fig. 3d and Supplementary Fig. 7). The  $\text{Fe}^{2+}$   
168 ion also occasionally moves closer to TM1 to interact with D39, consistent with the additional  
169 N-domain site observed in the hepcidin-bound structure. In parallel simulations of apo-FPN run  
170 without  $\text{Fe}^{2+}$  ions, we observed mobility of TM7b, with significant fluctuations of D325 (Fig. 3e).  
171 This observation is consistent with comparatively weaker cryo-EM density for TM7b as  
172 compared to other transmembrane helices in apo-FPN (Supplementary Fig. 7). By contrast,  
173 both D325 and TM7b are less mobile in simulations with iron bound at the C domain site (Fig.  
174 3e). Divalent metal binding to the C domain may therefore stabilize an otherwise dynamic TM7b  
175 in a conformation that favors hepcidin-binding.

176

177 The identification of two metal binding sites within FPN raises the question of whether both sites  
178 are required for iron efflux. Several human FPN mutations that lead to hereditary  
179 hemochromatosis map to residues that directly coordinate  $\text{Co}^{2+}$  in the C domain, including  
180 C326S/F/Y<sup>13,29-31</sup> and H507R<sup>32</sup>. Although these mutations likely disrupt the precise coordination  
181 geometry required for metal binding, they are fully competent to transport iron even in the  
182 presence of hepcidin; indeed, this lack of hepcidin-responsiveness leads to iron overload.

183 Mutation of D325 leads to decreased iron efflux<sup>22</sup>, which initially suggested a key site for iron  
184 efflux in the C domain of FPN<sup>24</sup>. However, recent modeling studies of an inward open  
185 conformation of FPN based on bbFPN suggest that D325 may interact with the N domain; loss  
186 of iron efflux in D325 mutants may therefore be caused by disruption of the extracellular gate<sup>33</sup>.  
187 By contrast, mutation of D39 to alanine in the N domain metal binding site of FPN completely  
188 abolishes iron efflux from HEK293 cells<sup>22</sup>, suggesting that the N domain may be a primary site  
189 for effluxed iron. Because the C domain metal-binding site is important for hepcidin binding, it  
190 may primarily serve an important iron-dependent regulatory function in hepcidin control of FPN  
191 activity.

192

### 193 **Hepcidin occludes outward open FPN**

194 Hepcidin binds FPN in a central cavity between the N and C domains, acting as a molecular  
195 cork to completely occlude the iron efflux pathway (Fig. 1c and 4a). This structural observation  
196 supports recent studies demonstrating acute inhibition of iron transport by hepcidin that is  
197 independent of FPN ubiquitination and degradation<sup>6</sup>. Although the conformations of apo- and  
198 Co<sup>2+</sup>-hepcidin-bound FPN are highly similar (RMSD 0.73 Å), the Co<sup>2+</sup>-hepcidin-bound structure  
199 shows a ~3 Å rigid body separation of the N and C domains on the extracellular side of FPN  
200 (Fig. 4b). Within the N domain, hepcidin binding leads to displacement of TM2 from the central  
201 cavity, driven in part by a specific contact between I6 of hepcidin and T61 and Y64. Within the C  
202 domain, the largest conformational changes occur around the Co<sup>2+</sup> binding site, leading to  
203 changes in the conformation of TM7b and the extracellular side of TM11 (Fig. 4b).

204

205 Hepcidin makes extensive polar and hydrophobic contacts with FPN with a total buried surface  
206 area of ~1300 Å<sup>2</sup>. Our structure of hepcidin bound to FPN provides insight into disease-causing  
207 mutations associated with FPN gain of function in hereditary hemochromatoses. Several FPN  
208 mutations decrease hepcidin binding to FPN, including N144H/D/T<sup>34–36</sup>, C326S/F/Y<sup>13,29–31</sup>,  
209 Y333H<sup>37</sup>, Y501C<sup>6,38</sup>, D504N<sup>6,39</sup> and H507R<sup>32</sup>. Of these, C326 and H507 directly coordinate the  
210 cobalt ion and mutations therefore indirectly affect hepcidin affinity or alter the atomic basis of  
211 binding specificity. Other interactions between FPN and hepcidin are either hydrophobic or  
212 depend on hepcidin amide backbone atoms, which is consistent with the relatively high  
213 tolerance of amino acid substitutions within hepcidin<sup>40</sup>. For example, Y333 fits into a  
214 hydrophobic cavity in hepcidin and hydrogen bonds with the backbone carbonyl of hepcidin  
215 residue M21 (Fig. 4c). D504 in FPN coordinates the backbone amide of hepcidin H3 while Y501

216  $\pi$ -stacks with the imidazole side chain of H3 (Fig. 4c). A further hydrogen bond between N144  
217 and Y501 further stabilizes this interaction network. In contrast to these mutations, the Y64N/H  
218 mutants retain hepcidin binding<sup>6</sup>, but are completely resistant to hepcidin-induced FPN  
219 ubiquitination<sup>41,42</sup>. The outward displacement of TM2 near Y64 induced by hepcidin may  
220 therefore be important for FPN ubiquitination (Fig. 4c).

221

222 The structure of hepcidin bound to FPN provides insight into prior efforts to engineer hepcidin  
223 mimetics as potential therapeutics for diseases of iron overload<sup>20,40,43,44</sup>. Although the first two  
224 residues of hepcidin (DT) are dispensable for activity, residues 3-8 (HFPICI) are absolutely  
225 required for function<sup>20</sup>. Indeed, the first two residues of hepcidin make minimal interactions with  
226 FPN (Fig. 4c). By contrast, alanine scanning mutagenesis suggested an important role for  
227 hydrophobic hepcidin residues including F4 and F9, and to a lesser extent H3 and I6<sup>40,43,44</sup>.  
228 Residues F4 and F9 insert between the N and C domains of FPN at opposite ends of the central  
229 cavity (Fig. 4c); hydrophobic residues at these positions likely stabilize the FPN outward open  
230 state. More unexpected is the extensive set of contacts between hepcidin residues 10-25 and  
231 TM7b of FPN. Prior studies have recapitulated hepcidin activity with a linear peptide composed  
232 of hepcidin residues 1-9, though with a ~8-20 fold reduction in potency<sup>40,45</sup>. Whether these  
233 minihepcidins fully plug the iron efflux pathway remains unclear. Furthermore, in the absence of  
234 structural data, it remains unclear whether minihepcidin variants coordinate divalent metals in  
235 the same manner as observed for hepcidin in our structure.

236

237 In addition to blocking the iron transport pathway, hepcidin regulates FPN by causing  
238 ubiquitination of lysine residues in intracellular loop 3 (ICL3)<sup>9,10</sup>. Among these, K240 is critical for  
239 hepcidin-induced FPN internalization and degradation. Neither the apo- or Co<sup>2+</sup>-hepcidin-bound  
240 structures resolve residues 239-288 of ICL3, precluding a structural understanding of how  
241 hepcidin regulates the conformation of K240. In the resolved regions of ICL3, we observe no  
242 significant conformational changes between apo- and Co<sup>2+</sup>-hepcidin-bound FPN (Fig. 4d,e).  
243 Several caveats may limit our structural analysis of hepcidin-induced conformational changes in  
244 FPN, including the lack of a membrane voltage or proton gradient across the lipid nanodisc, the  
245 requirement for specific lipids for FPN function, or other cofactors important in hepcidin-induced  
246 FPN ubiquitination. However, the structures provide clues into the role of ICL3 in FPN function.  
247 The N terminal portion of ICL3 (residues 230-238) forms interactions with the N domain (Fig.  
248 4d). Notably, K236 makes an ionic interaction with the intracellular gate residue D157. The C

249 terminal portion of ICL3 (residues 291-304) forms an amphipathic helix that makes a number of  
250 contacts with both TM2 in the N domain and TM11 in the C domain, which both undergo  
251 conformational changes upon binding hepcidin (Fig. 4e). In both cases, the resolved regions of  
252 ICL3 are primed to sense the conformation of the transporter as it shuttles iron and binds  
253 hepcidin. These regions may therefore serve as important conduits linking the conformation of  
254 hepcidin binding on the extracellular side to K240 conformation on the intracellular side.

255

### 256 **Hepcidin is coupled to iron binding**

257 The direct interaction between hepcidin and  $\text{Co}^{2+}$  in our structure is unexpected (Fig. 5a), and  
258 suggests that divalent metals may be important for hepcidin binding to FPN. We therefore  
259 directly tested the effect of  $\text{Fe}^{2+}$  and  $\text{Co}^{2+}$  on hepcidin affinity at FPN. A fluorescently tagged  
260 version of hepcidin (Rhodamine green-hepcidin<sup>25</sup>, RhoG-Hep) bound to nanodisc-reconstituted  
261 ferroportin with an apparent  $K_D$  of 210 nM ( $\text{p}K_D = -6.67 \pm 0.02$ ) (Fig. 5b). In the presence of 10  
262  $\mu\text{M}$   $\text{FeCl}_2$ , we observed a significantly increased affinity of 2.5 nM ( $\text{p}K_D = -8.61 \pm 0.21$ ), an  
263 almost 80-fold change in the potency of hepcidin at FPN. Addition of  $\text{CoCl}_2$  also increased  
264 hepcidin affinity. Consistent with a cooperative effect, the effect of  $\text{CoCl}_2$  on hepcidin binding  
265 was saturable (Fig. 5c).

266

267 The reference range for hepcidin concentration in healthy adults is  $\sim 1\text{-}30 \text{ nM}^{46}$ . Our *in vitro*  
268 binding experiment with purified FPN indicates minimal hepcidin binding to FPN in the absence  
269 of a divalent metal, suggesting that metal binding to FPN may regulate hepcidin activity *in vivo*.  
270 Our structure of FPN bound to  $\text{Co}^{2+}$  and hepcidin revealed conformational changes in TM7b  
271 associated with hepcidin binding (Fig. 3e) and a direct contact between hepcidin and  $\text{Co}^{2+}$  (Fig.  
272 3b); both could be important for the observed effect of  $\text{Fe}^{2+}$  and  $\text{Co}^{2+}$  on hepcidin binding. We  
273 therefore tested whether disruption of the C domain iron binding site influences hepcidin  
274 binding. Even in the presence of 50  $\mu\text{M}$   $\text{CoCl}_2$ , the D325N, C326S, and H507R mutants bound  
275 hepcidin weakly, titrating in a micromolar range similar to wild-type FPN in the absence of  
276 divalent metals (Fig. 5c). These results highlight the critical role of the C domain metal site in  
277 potent hepcidin binding to FPN, which is likely important in homeostatic control of iron levels in a  
278 physiological setting.

279

### 280 **Discussion**

281 Ferroportin is a central regulator of iron homeostasis in humans. Both human FPN and the  
282 bacterial homologue bbFPN show remarkable similarities in their overall architecture, with a  
283 unique conformation of TM7 responsible for molecular recognition of iron within the C domain.  
284 This similarity suggests a deep evolutionary history for FPN-like transporters within the broader  
285 major facilitator superfamily. Heparin, by contrast, is specific to vertebrates and likely evolved  
286 as a new strategy to regulate a critical point in iron absorption. The structures presented here  
287 map, at high resolution, metal and hepcidin binding to FPN.

288

289 We determined that hepcidin binding to FPN is greatly potentiated by iron itself, potentially due  
290 to the stabilizing effect iron has on the hepcidin-binding site of FPN (Fig. 5d). With iron, the  
291 binding affinity of hepcidin falls in a range concordant with the concentration of hepcidin  
292 observed in healthy human adults. In normal iron homeostasis, this may enable hepcidin to  
293 selectively bind and regulate FPN molecules actively transporting iron and loaded with  $\text{Fe}^{2+}$ ,  
294 while sparing FPN molecules located on cells with low transport activity. Heparin binding to  
295 FPN would both trap the transporter in an outward open state and limit iron egress; both actions  
296 acutely decrease iron efflux, as has been recently reported<sup>6</sup>. Elevated hepcidin levels likely  
297 inappropriately overcome this regulatory strategy and degrade FPN even in the absence of  
298 active iron efflux. The potentiation of hepcidin activity by iron may therefore have immediate  
299 consequences for the development of hepcidin mimetics currently in clinical trials<sup>16</sup>.  
300 Furthermore, hepcidin antagonism by direct targeting of FPN may require molecules with high  
301 potency to overcome the nanomolar effect of the hormone in the presence of iron. The structural  
302 and functional insights into FPN function presented here therefore provide critical foundations  
303 for the discovery of therapeutics for human disorders of iron homeostasis.

304

305



306 MAIN TEXT FIGURES

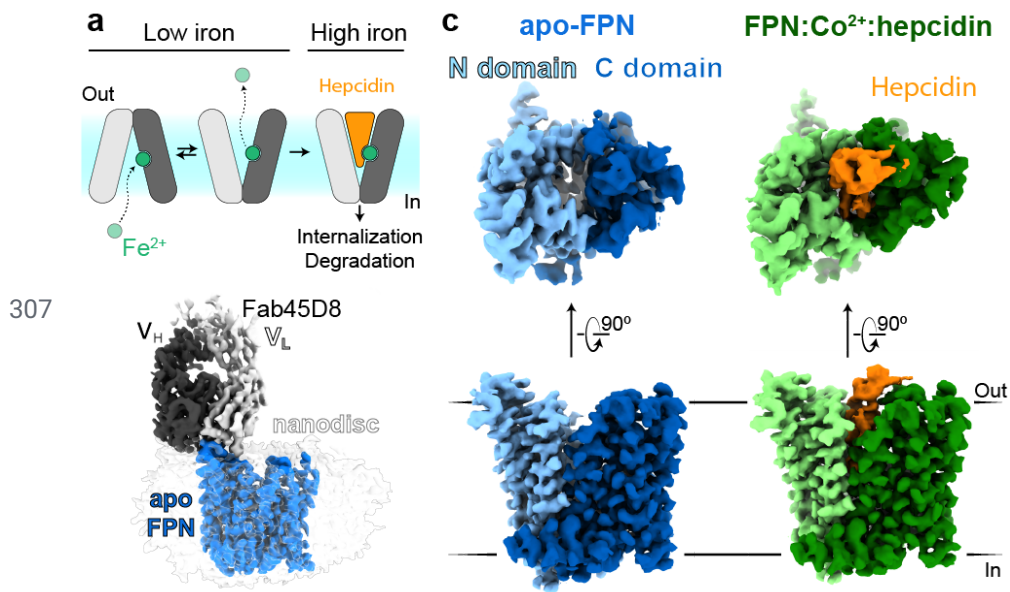

308

309 **Figure 1. Structures of human ferroportin.** **a**, Ferroportin effluxes cellular iron (Fe<sup>2+</sup>) by an  
310 alternating access mechanism. Hepcidin binds to outward open ferroportin and induces  
311 ubiquitination and degradation. **b**, Cryo-EM map of apo-FPN-Fab45D8 complex in lipid  
312 nanodisc. **c**, Cryo-EM density of apo and Co<sup>2+</sup>/hepcidin bound FPN. The N and C domains are  
313 colored in different shades of blue for apo-FPN and green for Co<sup>2+</sup>/hepcidin bound FPN.  
314 Hepcidin (orange) binds to an extracellular facing cavity in FPN.

315

316

317

318

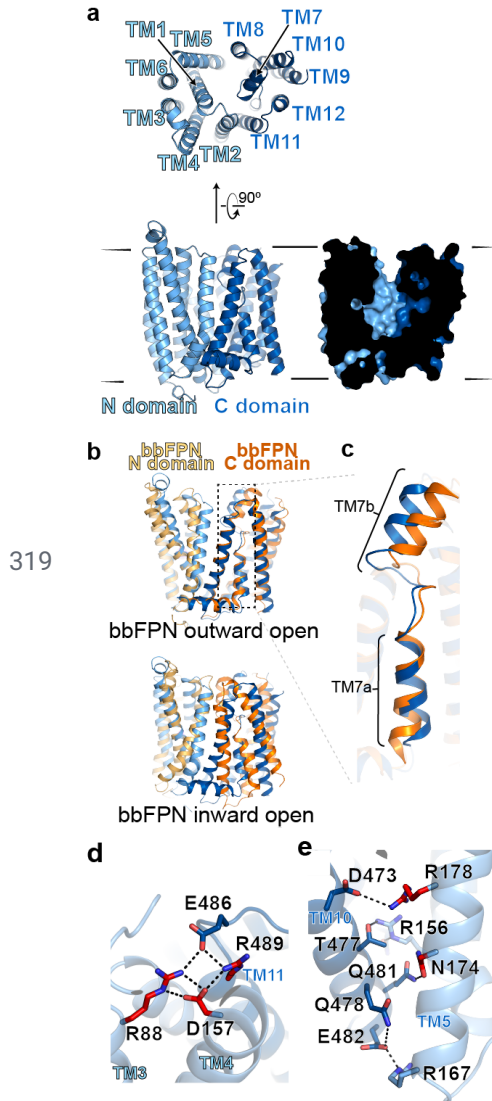

320 **Figure 2. Structure of apo-FPN and similarity to bbFPN.** **a**, Ribbon diagram of FPN reveals  
321 12 transmembrane helices. The N- and C-domains are colored in different shades of blue.  
322 Cutaway surface view (right) shows outward open conformation. **b**, Human FPN aligned to the  
323 outward-open (PDB: 5AYN) and inward-open (PDB: 5AYO) conformations of bbFPN. **c**, Unique  
324 architecture of TM7 shared between human FPN and bbFPN. **d**, Intracellular gating residues  
325 are shown as sticks. Residues in red are known FPN loss-of-function mutations **e**, TM10 and  
326 TM5 form an extensive network of interactions, further stabilizing the outward open  
327 conformation. Residues highlighted in red are known loss-of-function mutations that lead to  
328 ferroportin disease in humans.

329

330

331

332

333



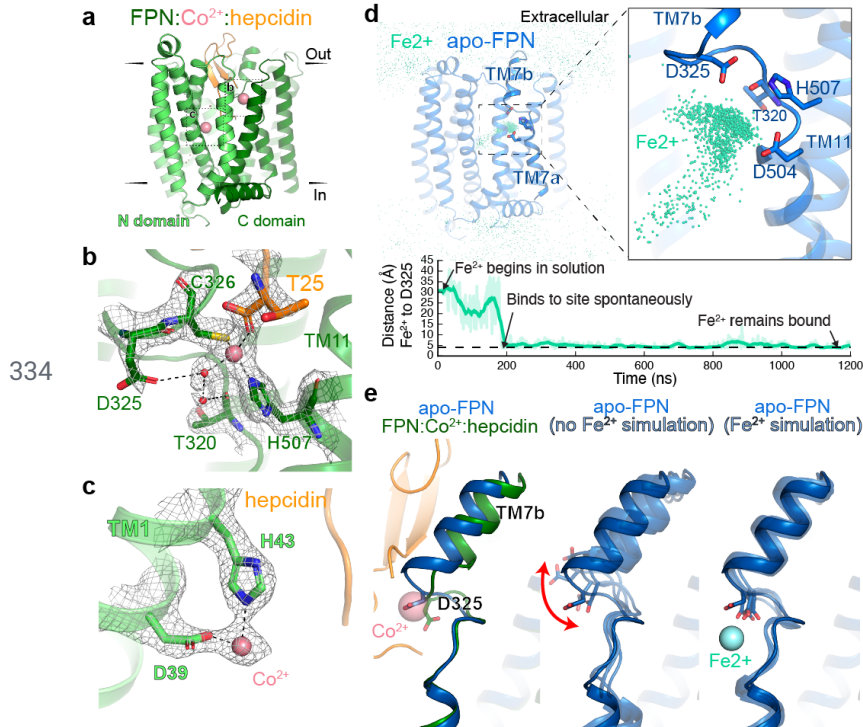

335

336 **Figure 3. Iron binds to the N and C domains of FPN.** **a**, Ribbon diagram of  
337 FPN-Co<sup>2+</sup>-hepcidin complex. Heparin binds an extracellular-facing pocket in FPN. **b**, Closeup  
338 view of cryo-EM density for Co<sup>2+</sup> ion in the FPN C domain. Co<sup>2+</sup> binds with tetrahedral  
339 coordination to C326, H507, a water molecule, and the hepcidin C-terminus. **c**, Closeup view of  
340 cryo-EM density for Co<sup>2+</sup> ion in the FPN N domain, coordinated by H43 and D39. **d**, In molecular  
341 dynamics simulations with Fe<sup>2+</sup> initially positioned randomly in bulk water surrounding FPN, the  
342 Fe<sup>2+</sup> ions spontaneously bind to a region near H507, D325, and D504. The aggregated position  
343 of Fe<sup>2+</sup> ions from six simulations, each 2  $\mu$ s in length, is shown superimposed with apo FPN. **e**,  
344 In one representative simulation, an Fe<sup>2+</sup> ion spontaneously binds within 200 ns and remains  
345 localized at this site for more than 1000 ns. Distance shown is from the ion to the nearest  
346 oxygen atom of the D325 side chain. Thick trace represents a 15-ns sliding mean and thin  
347 traces represent unsmoothed values. **e**, Comparison of TM7b conformation in apo-FPN and  
348 FPN bound to Co<sup>2+</sup> and hepcidin. In simulations without Fe<sup>2+</sup>, TM7b is dynamic, with significant  
349 fluctuation of D325. D325 coordinates Fe<sup>2+</sup> in simulations, and is associated with decreased  
350 TM7b motion.

351

352

353

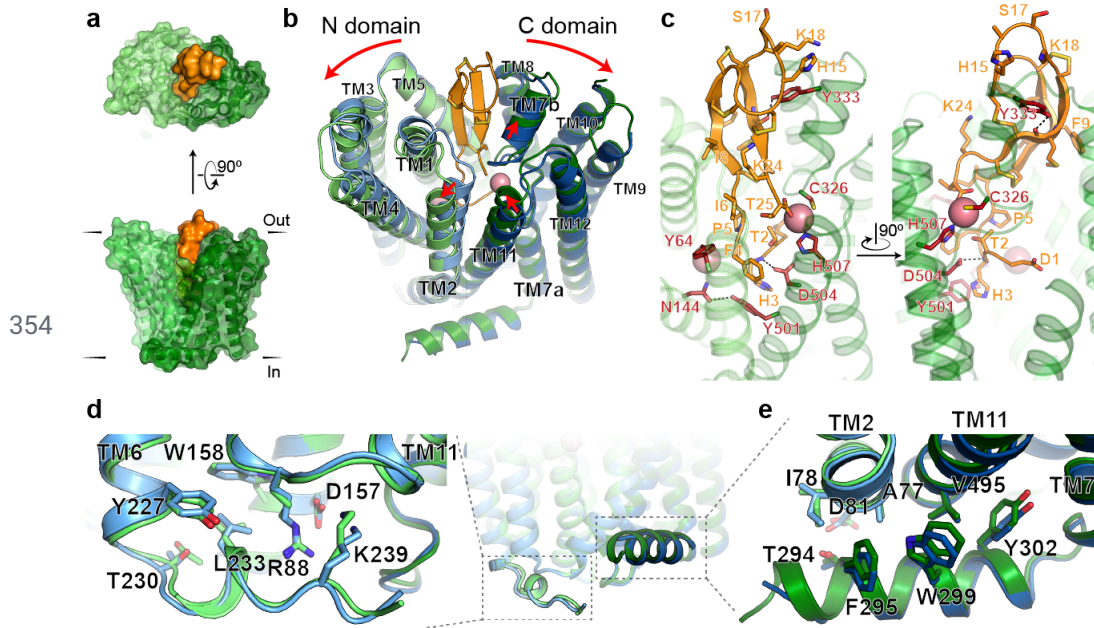

355 **Figure 4. Hepcidin binding to FPN.** **a**, Surface representation of the FPN-Co<sup>2+</sup>-hepcidin  
356 complex viewed from the extracellular side and perpendicular to the membrane plane. **b**,  
357 Ribbon diagrams of apo-FPN (blue) aligned to FPN-Co<sup>2+</sup>-hepcidin (green, orange, and pink  
358 spheres) showing the overall separation of the N and C domains, and the displacement of TMs  
359 containing key residues for hepcidin binding. **c**, Close-up views of the hepcidin binding site.  
360 Residues in red are known hepcidin resistance mutations involved in ferroportin disease. **d,e**  
361 Close-up of interactions between the transmembrane regions and intracellular loop 3.

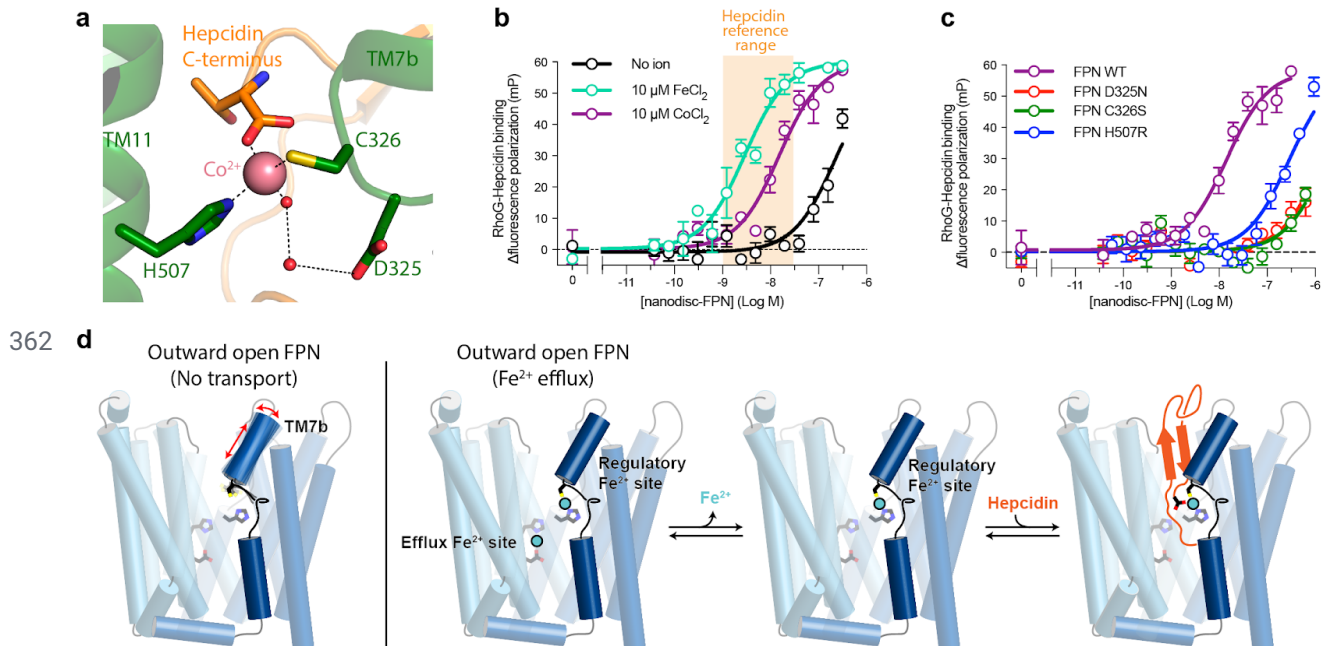

363 **Figure 5. Hepcidin binding is potentiated by iron.** **a**, FPN C domain metal binding site.  
364 Shown are residues that interact with  $\text{Co}^{2+}$ , including D325, C326, and H507 in FPN as well as  
365 the hepcidin C-terminus. **b**, Fluorescence polarization increase in rhodamine green-labeled  
366 hepcidin (RhoG-hepcidin) as nanodisc-reconstituted FPN is titrated with a  $K_D$  of 210 nM.  
367 Addition of 10  $\mu\text{M}$   $\text{FeCl}_2$  or  $\text{CoCl}_2$  increases the affinity of hepcidin to 2.5 nM and 7.7 nM ( $\text{pK}_D =$   
368  $-8.11 \pm 0.16$ ), respectively. Hepcidin concentration range in healthy human adults is shown in  
369 orange. **c**, Mutation of the C domain metal binding sites decreases RhoG-hepcidin binding  
370 affinity at FPN, even in the presence of 50  $\mu\text{M}$   $\text{CoCl}_2$ . All values are reported as mean  $\pm$  s.e.m.  
371 Error bars represent s.e.m. **d**, Model for iron-coupled hepcidin regulation of FPN function. In  
372 settings of iron efflux, TM7b is conformationally stabilized by iron coordination in the C domain  
373 regulatory site. High affinity hepcidin binding to outward open FPN depends on the direct  
374 coordination of iron in the C domain.

375  
376  
377

## 378 **METHODS**

379 No statistical methods were used to predetermine sample size. The experiments were not  
380 randomized and the investigators were not blinded to allocation during experiments and  
381 outcome assessment.

382

### 383 **Expression and purification of human ferroportin**

384 The wild-type human FPN gene was cloned into a pVL1392 vector containing an expression  
385 cassette comprised of a C terminal human rhinovirus 3C (HRV-3C) protease recognition  
386 sequence followed by a human protein C epitope tag (EDQVDPRLIDGK) and an 8x  
387 polyhistidine tag. Baculovirus was generated using *Spodoptera frugiperda* Sf9 insect cells  
388 (unauthenticated and untested for mycoplasma contamination, Expression Systems 94-001F)  
389 and the construct was expressed in *Spodoptera frugiperda* Sf9 insect cells. Cells were collected  
390 48 h after transduction and stored at  $-80^{\circ}\text{C}$  until further use. Frozen cell pellets were thawed  
391 and washed with a hypotonic buffer (20 mM HEPES pH 7.50, 1 mM EDTA, supplemented with  
392 20  $\mu\text{g}/\text{mL}$  leupeptin, and 160  $\mu\text{g}/\text{mL}$  benzamidine) before solubilizing with 50 mM HEPES pH  
393 7.5, 300 mM NaCl, 1% (w/v) n-dodecyl- $\beta$ -D-maltopyranoside (DDM, Anatrace), 0.1% (w/v)  
394 cholesteryl hemisuccinate (CHS, Steraloids), 1 mM EDTA supplemented with 20  $\mu\text{g}/\text{mL}$   
395 leupeptin, and 160  $\mu\text{g}/\text{mL}$  benzamidine for 1 h at  $4^{\circ}\text{C}$ . Following centrifugation, the resulting  
396 supernatant was loaded on homemade anti-protein C antibody Sepharose beads and washed  
397 extensively in 50 mM HEPES pH 7.50, 300 mM NaCl, 2 mM  $\text{CaCl}_2$ , 0.1% (w/v) DDM, 0.01%  
398 (w/v) CHS. FPN was eluted with 50 mM HEPES pH 7.50, 300 mM NaCl, 0.1% (w/v) DDM,  
399 0.01% (w/v) CHS, 0.2 mg/mL Protein C peptide (Genscript) and 5 mM EDTA. The protein was  
400 concentrated with a Vivaspin 100-kDa MWCO concentrator and the monomeric FPN fraction  
401 was collected after size-exclusion chromatography (SEC) over a Superdex S200 Increase  
402 10/300 GL column (GE Healthcare) equilibrated with 20 mM HEPES pH 7.50, 100 mM NaCl and  
403 0.1% (w/v) DDM, and 0.01% (w/v) CHS.

404

### 405 **Expression and purification of MSP**

406 Constructs encoding MSP-NW9 or MSP-NW11<sup>47</sup> in the pET28b vector (Addgene #133442) were  
407 transformed into BL21(DE3) Rosetta *Escherichia coli*, and grown in terrific broth medium  
408 supplemented with 2 mM  $\text{MgCl}_2$  and 0.1% (w/v) glucose at  $37^{\circ}\text{C}$ . At  $\text{OD}_{600}$  of  $\sim 0.6$ , expression  
409 was induced by addition of 400  $\mu\text{M}$  isopropyl  $\beta$ -d-1-thiogalactopyranoside (IPTG) and lowering  
410 the temperature to  $20^{\circ}\text{C}$ . Cells were harvested after 16 hours and resuspended into 5 mL lysis

411 buffer (200 mM Tris pH 8.0, 500 mM NaCl, 1% (v/v) Triton X-100 (Sigma), 0.02 mg/mL  
412 leupeptin, 0.16 mg/mL benzamidine, and benzonase) per gram pellet. After stirring for 30 min at  
413 4°C, cells were lysed by pulsed sonication on ice. The lysate was cleared by centrifugation at  
414 15,000 x g for 25 min at 4°C and loaded on Ni-NTA Sepharose. Ni-NTA beads were washed  
415 with 50 mM Tris pH 8.0, 500 mM NaCl, 1% (v/v) Triton, then 50 mM Tris pH 8.0, 500 mM NaCl,  
416 50 mM sodium cholate, then 50 mM Tris pH 8.0, 500 mM NaCl, and finally with 50 mM Tris pH  
417 8.0, 500 mM NaCl, 30 mM Imidazole. MSP was eluted with 50 mM Tris-HCl pH 8.0, 500 mM  
418 NaCl, 400 mM Imidazole and dialyzed into 50 mM Tris-HCl, pH 8.0, 100 mM NaCl, 1 mM  
419 EDTA, 0.1 mM TCEP at 4°C. The following day, MSP was concentrated on a Vivaspin 10-kDa  
420 MWCO concentrator, aliquots were flash frozen in liquid nitrogen and stored at -80°C for  
421 reconstitution.

422

#### 423 **Isolation, expression and purification of Fab45D8**

424 The heavy and light chain sequences of mAb45D8<sup>25</sup> were separately cloned into pcDNA3.4 and  
425 the resulting vectors were transfected into Expi293F Human Embryonic Kidney cells (Life  
426 Technologies) using a 1:2 mass ratio of light and heavy chain DNA with the Expifectamine  
427 transfection kit (Life Technologies) as per the manufacturer's instructions. Supernatant  
428 containing mAb45 was harvested 136 h after transfection and loaded on homemade Protein G  
429 Sepharose beads and extensively washed with a buffer comprising 20 mM HEPES pH 7.50,  
430 and 100 mM NaCl. mAb45D8 was eluted with 100 mM glycine (pH 3.0) and fractions were  
431 immediately neutralized with 200 mM HEPES pH 7.50. To generate the Fab fragment, 10 mg of  
432 purified mAb45D8.1 was diluted into 9.5 ml freshly prepared cleavage buffer (20 mM sodium  
433 phosphate pH 7.00, 10 mM EDTA, and 10 mM cysteine) and treated with 0.5 ml agarose  
434 immobilized papain (Thermo Scientific) at 37°C. After 16 h the cleaved Fab45D8 fragment was  
435 purified by reverse Protein A affinity chromatography, followed by SEC into buffer comprising 20  
436 mM HEPES pH 7.50 and 100 mM NaCl. Fab45D8 was concentrated on a Vivaspin 10-kDa  
437 MWCO concentrator, and aliquots were flash frozen in liquid nitrogen and stored at -80°C for  
438 later use.

439

#### 440 **Reconstitution of FPN into lipidic nanodisc**

441 Purified FPN (0.2-0.5 mg) was mixed with purified MSP and a lipid mixture containing a 2:3  
442 weight ratio of 1-palmitoyl-2-oleoylphosphatidylcholine (POPC, Avanti) and  
443 1-palmitoyl-2-oleoyl-sn-glycero-3-phospho-(1'-rac-glycerol) (POPG, Avanti). For reconstitution



444 into NW9 nanodiscs, an FPN:MSP:Lipid molar ratio of 1:20:1100 was used. For reconstitution  
445 into NW11 nanodiscs, an FPN:MSP:Lipid molar ratio of 1:20:800 was used. The reconstitution  
446 sample was nutated for 1 h at 4°C before addition of 0.2 g/mL SM2-BioBeads (BioRad), and the  
447 reconstitution sample was further nutated overnight at 4°C before removal of the biobeads. FPN  
448 containing nanodiscs were purified by loading the reconstitution sample on anti-protein C  
449 antibody Sepharose beads and washing extensively with 20 mM HEPES pH 7.50, 100 mM  
450 NaCl, and 1 mM CaCl<sub>2</sub> to remove empty nanodiscs. FPN containing nanodiscs were eluted with  
451 20 mM HEPES pH 7.50, 100 mM NaCl, 0.25 mM EDTA, and 0.2 mg/mL Protein C peptide  
452 (Genscript), and concentrated on a Vivaspin 50-kDa concentrator.

453

#### 454 **Crystallization and structure determination of Fab45D8**

455 Purified Fab45D8 was diluted to 13.0 mg/mL in 20 mM HEPES pH 7.5, 100 mM NaCl. Fab45D8  
456 crystals were obtained in 0.3 M trimethylamine-N-oxide (TMAO), 0.1 M Tris pH 8.5, and 30%  
457 (w/v) PEG 2000 MME at 20 °C. Individual crystals were flash frozen in liquid nitrogen after a 30  
458 s soak in 0.3 M trimethylamine-N-oxide (TMAO), 0.1 M Tris pH 8.5, and 30% (w/v) PEG 2000,  
459 and 20% v/v ethylene glycol. A full diffraction dataset was collected at the Advanced Photon  
460 Source GM/CA-CAT beamline 23ID-B, and processed using xia2dials<sup>48</sup> implementation of  
461 XDS<sup>49</sup>. The structure of the Fab was solved by molecular replacement using Phaser<sup>50</sup>, with a  
462 search model of a closely related germline mouse monoclonal antibody (PDB ID: 6BZV<sup>51</sup>)  
463 lacking complementarity determining regions (CDRs). The model was iteratively improved by  
464 refinement in Coot<sup>52</sup> and Phenix<sup>53</sup>. Data collection and refinement statistics are summarized in  
465 Supplementary Table 1. The final model contained 96.77%, 2.23% and 0% in the favored,  
466 allowed and outlier regions of the Ramachandran plot, respectively as assessed by  
467 MolProbity<sup>54</sup>.

468

#### 469 **Calcein transport assay for divalent cations**

470 FPN was reconstituted into liposomes for divalent cation transport assays. Empty liposomes  
471 were prepared as a 3:1 mass ratio of 1-palmitoyl-2-oleoyl-sn-glycero-3-phosphoethanolamine  
472 (POPE, Avanti) to POPG dissolved in chloroform, followed by gentle evaporation of the  
473 chloroform under a stream of nitrogen gas, and overnight desiccation. The lipids were dissolved  
474 in 20 mM HEPES pH 7.40, 100 mM KCl to a final concentration of 12.5 mg/mL, sonicated until  
475 optically clear, subjected to multiple freeze-thaw cycles, and extruded through a 400 nm  
476 polycarbonate filter (Avestin) to generate unilamellar vesicles. Subsequently 0.13% (w/v)

477 Triton-X100 (Sigma) was added to destabilize liposomes, corresponding to the concentration  
478 yielding 80% of the maximum OD<sub>540</sub> obtained in a liposome destabilization curve. Purified FPN  
479 was added at a 1:50 protein to lipid mass ratio and incubated for 15 min at 4°C. Control  
480 liposomes devoid of FPN were prepared in parallel using the same concentration of DDM. To  
481 remove excess detergent, 0.05 g/mL of SM2-BioBeads were added to the sample and nutated  
482 for 1 hr at 4°C, then 0.05 g/mL SM2-BioBeads were added followed by incubation overnight at  
483 4°C, and finally addition of 0.08 g/mL SM2-BioBeads followed by incubation for 2 hr at 4°C.  
484 Proteoliposomes were harvested by ultracentrifugation at 300,000 x g for 30 min and  
485 resuspended at a concentration of 2.0 mg/mL lipids in internal buffer comprised of 20 mM  
486 HEPES pH 7.40 and 100 mM KCl, before flash freezing in liquid nitrogen and storage at -80°C.  
487 On the day of the transport assay, proteoliposomes were thawed and incubated with 500 mM  
488 calcein (Sigma), then subjected to three freeze-thaw cycles, and extruded through a 400 nm  
489 polycarbonate filter. The liposomes were washed four times with external buffer comprising 20  
490 mM HEPES pH 7.40 and 100 mM NaCl, by repeated ultracentrifugation and resuspension.  
491 Immediately prior to the assay, the calcein containing proteoliposomes were diluted to 0.25  
492 mg/mL lipid in external buffer. Time-course fluorescence traces were recorded as 1 s  
493 integrations using a FluoroMax-4 (Horiba) with  $\lambda_{\text{ex}}$  of 490 nm and  $\lambda_{\text{em}}$  of 520 nm. Steady state  
494 fluorescence was recorded for at least 5 min, before addition of small aliquots of freshly  
495 prepared stocks of either FeCl<sub>2</sub> or CoCl<sub>2</sub>. To stabilize the ferrous (Fe<sup>2+</sup>) state, we prepared iron  
496 as a 1:10 ratio of sodium ascorbate:FeCl<sub>2</sub> immediately prior to the experiment. To determine the  
497 full extent of the calcein quenching response, 10  $\mu\text{M}$  of the divalent cation ionophore calcimycin  
498 (Sigma) was added at the end of each experiment. Transport data was normalized to the mean  
499 baseline fluorescence intensity prior to addition of ion.

500

### 501 **Hepcidin binding assays**

502 Fluorescence polarization measurements were performed using rhodamine-green labeled  
503 hepcidin (RhoG-hepcidin)<sup>25</sup>. For FPN saturation binding experiments, samples were prepared in  
504 a black 384-well plate (Greiner) containing 0-1  $\mu\text{M}$  of nanodisc reconstituted NW11-FPN and 5  
505 nM RhoG-hepcidin in sample buffer comprising 20 mM HEPES pH 7.50, 100 mM NaCl, and  
506 supplemented with FeCl<sub>2</sub>, CoCl<sub>2</sub> or MnCl<sub>2</sub> as indicated. For ion stimulation experiments, 100 nM  
507 NW11-FPN and 5 nM RhoG-Hepcidin was mixed with 0-600  $\mu\text{M}$  of CoCl<sub>2</sub>. For Fab binding  
508 experiments, 100 nM NW11-FPN and 5 nM RhoG-Hepcidin was mixed with 0 - 3  $\mu\text{M}$  of  
509 Fab45D8 in sample buffer containing 10  $\mu\text{M}$  CoCl<sub>2</sub>. Binding reactions were equilibrated for 60

510 min at RT, and fluorescence polarization was recorded on a Biotek Synergy H4 (Agilent) in  
511 polarization mode using fixed bandpass filters with  $\lambda_{\text{ex}}$  of 484 nm and  $\lambda_{\text{em}}$  of 520 nm.

512

513 Analytical fluorescence size exclusion chromatography (FSEC) was performed by mixing 25  $\mu\text{g}$   
514 of NW11-FPN with 2 x fold molar excess of RhoG-Hepcidin in sample buffer comprised of 20  
515 mM HEPES (pH 7.50), 100 mM NaCl and 10  $\mu\text{M}$   $\text{CoCl}_2$ . Samples were incubated for 20 min on  
516 ice and 1.5 x molar excess of Fab45D8, or sample buffer, was added followed by incubation for  
517 30 min on ice. For homologous competition, 1  $\mu\text{M}$  NW11-FPN was mixed with 30  $\mu\text{M}$  unlabelled  
518 hepcidin (Bachem) in sample buffer comprised of 20 mM HEPES (pH 7.50), 100 mM NaCl and  
519 10  $\mu\text{M}$   $\text{CoCl}_2$ , and incubated for 30 min on ice. Then 2  $\mu\text{M}$  RhoG-Hepcidin was added and the  
520 sample incubated for 30 min on ice. Samples were injected on a Superdex 200 Increase 10/300  
521 GL column (GE Lifesciences) pre-equilibrated in 20 mM HEPES pH 7.50, 100 mM NaCl, and 10  
522  $\mu\text{M}$   $\text{CoCl}_2$ . RhoG-Hepcidin fluorescence was recorded using an FP-1520 Intelligent  
523 Fluorescence Detector (Jasco) with  $\lambda_{\text{ex}}$  of 493 nm and  $\lambda_{\text{em}}$  of 524 nm.

524

#### 525 **Cryo-EM Sample Preparation and Data Collection**

526 Nanodisc-reconstituted apo-FPN was mixed with 1.15 molar excess of Fab45D8 and incubated  
527 on ice for 30 min. The complex was purified by size-exclusion chromatography over a Superdex  
528 S200 Increase 10/300 GL column (GE Healthcare) equilibrated with 20 mM HEPES pH 7.50,  
529 100 mM NaCl. For  $\text{Co}^{2+}$ /hepcidin samples, 600  $\mu\text{M}$   $\text{CoCl}_2$  and 30  $\mu\text{M}$  hepcidin (Bachem) was  
530 added to nanodisc-reconstituted FPN and incubated for 20 minutes on ice prior to addition of  
531 Fab45D8. The resulting complex was purified over size-exclusion chromatography as for the  
532 apo sample but with the addition of 100  $\mu\text{M}$   $\text{CoCl}_2$  in the chromatography buffer. Collected  
533 fractions were supplemented with fresh hepcidin to 30  $\mu\text{M}$ . For both preparations, fractions  
534 containing the nanodisc-FPN-Fab45D8 complex were concentrated to  $\sim 3$  mg/ml on a Vivaspin  
535 50-kDa MWCO concentrator and freshly used for electron microscopy.

536

537 For high-resolution cryo-EM, the apo-FPN-Fab45D8 complex was diluted to 0.0375 mg/mL in 20  
538 mM HEPES pH 7.5, 100 mM NaCl directly prior to vitrification, and 2  $\mu\text{L}$  sample was applied to  
539 glow-discharged gold holey carbon 1.2/1.3 300-mesh grids (Quantifoil) coated in-house with  
540 graphene oxide<sup>55-57</sup>. Grids were blotted for 2-4 seconds at 0 force and 10 seconds wait time  
541 before being plunge vitrified in liquid ethane using a MarkIV Vitrobot (ThermoFisher). The  
542 blotting chamber was maintained at 22°C and 100% humidity during freezing.



543

544 Co<sup>2+</sup>/hepcidin samples were diluted to 1.5 mg/mL in gel filtration buffer (20 mM HEPES pH 7.5,  
545 100 mM NaCl, 100  $\mu$ M CoCl<sub>2</sub>) before vitrification. Grids were blotted for 3 seconds at 0 force  
546 and 5 seconds wait time before being plunge vitrified in liquid ethane using a MarkIV Vitrobot  
547 (ThermoFisher). The blotting chamber was maintained at 22°C and 100% humidity during  
548 freezing.

549

550 FPN-Fab45D8 and Co<sup>2+</sup>/hepcidin-FPN-Fab45D8 movies were collected using a Titan Krios  
551 (ThermoFisher) outfitted with a K3 camera and Bioquantum energy filter (Gatan). The K3  
552 detector was operated in superresolution mode and the energy filter slit width was set to 20 eV.  
553 Movies were collected at a nominal magnification of 105,000x, physical pixel size 0.834Å/pix,  
554 with a 70  $\mu$ m C2 aperture and 100  $\mu$ m objective aperture at a dose rate of 8 e<sup>-</sup>/pixel/second. A  
555 total dose of 66 e<sup>-</sup>/Å<sup>2</sup> was collected as a 120-frame movie, resulting in a 6-second movie with  
556 0.55 e<sup>-</sup>/frame. Data were collected using semi-automated imaging scripts in SerialEM<sup>58</sup>. For  
557 FPN-Fab45D8, 5009 movies were collected using a 3x3 image shift pattern at 0° tilt and 406  
558 movies were collected on-axis with a 30° stage tilt in two separate data collection sessions. For  
559 Co<sup>2+</sup>/hepcidin-FPN-Fab45D8, 4395 movies were collected at 0° tilt in a single data collection  
560 session.

561

### 562 **Cryo-EM Image Processing**

563 For FPN-Fab45D8, data were motion corrected and 2x binned on-the-fly using MotionCor2<sup>59</sup> in  
564 the SCIPION pipeline<sup>60</sup>. Motion corrected micrographs were imported into cryoSPARC<sup>61</sup> and  
565 RELION<sup>62</sup> and contrast transfer function parameters were calculated using CTFFIND4<sup>63</sup>. CTF  
566 information for tilted images were estimated using patch CTF estimation in cryoSPARC.  
567 138,314 particles were selected from 497 micrographs using the Blob picker in cryoSPARC. 2D  
568 class averages were generated after extracting the putative particles with a 300-pixel box and  
569 binning to 64 pixels. Six of these averages were used as templates for further particle picking.  
570 Template picking yielded 4,737,795 particles. These were split into 6 groups to increase speed  
571 of processing, extracted in a 300-pixel box, and binned to 64 pixels. 2D classification was run in  
572 cryoSPARC with default settings except: number of 2D classes 200, initial classification  
573 uncertainty factor 4, number of online-EM iterations 40, batch size per class 300. Objectively  
574 “good” (showing clear Fab and receptor density) class averages were selected and exported to  
575 RELION format using csparc.py<sup>64</sup>. Class averages that were not classified as “good”, but were

576 not clearly ice contamination or graphene oxide edges, were run through a second round of 2D  
577 classification with default settings except: number of 2D classes 200, number of online-EM  
578 iterations 40, batch size per class 300. All “saved” class averages from the second rounds of 2D  
579 classification in cryoSPARC selected and exported to RELION format using `csparc.py`. Particles  
580 were extracted from CTF-corrected images in RELION at a box size of 300 pixels, binned to 128  
581 pixels. 1,326,130 particles, in three groups (detailed in Supplementary Fig. 3) were classified in  
582 3D with image alignment in RELION using an initial model generated in cryoSPARC from  
583 80,000 particles collected on a Talos Arctica filtered to 40 Å, C1 symmetry, a regularization  
584 parameter of 4, for 30-35 iterations with no mask. Particles from classes with resolved  
585 transmembrane (TM) helices were selected, extracted in a 300-pixel box, and imported back  
586 into cryoSPARC. Non-uniform refinement was run with default settings and no resolution limit,  
587 resulting in angle and shift assignments for 850,000 particles. These particles were  
588 subsequently exported to RELION format using `csparc.py` and run through 3D classification  
589 without image alignment in RELION. Four of the 12 classes were selected, imported into  
590 RELION, run through non-uniform alignment with an automatically generated mask, and refined  
591 to a reported global resolution of 3.2 Å. The resulting map showed clear signs of mild preferred  
592 orientation (Supplementary Fig. 3). The particles were exported into RELION format using  
593 `csparc.py`, converted into an image stack, and imported into cisTEM<sup>65</sup> as a refinement package.  
594 The particles were reconstructed and half-maps were generated using the “generate 3D”  
595 command. These half-maps, as well as the half-maps from cryoSPARC were run through our  
596 lab’s directional Fourier shell correlation (dFSC) program<sup>66</sup> clearly showing a more distributed  
597 range of views in the map generated by cisTEM. Maps were sharpened in RELION. Resolutions  
598 are reported using the FSC = 0.143 cut-off<sup>67</sup> and were estimated in cryoSPARC and cisTEM.  
599  
600 For Co<sup>2+</sup>/hepcidin-FPN-Fab45D8, data were motion corrected and 2x binned on-the-fly using  
601 MotionCor2<sup>59</sup> in the SCIPION pipeline<sup>60</sup>. Motion corrected micrographs were imported into  
602 cryoSPARC<sup>61</sup> and contrast transfer function parameters were calculated using CTFFIND4<sup>63</sup>.  
603 3,753,516 particles were selected from 4395 micrographs using the template picker in  
604 cryoSPARC with 2D averages from the apo-FPN dataset as templates. These particles were  
605 extracted in a 360-pixel box, and binned to 64 pixels. 2D classification was run in cryoSPARC  
606 with default settings except: number of 2D classes 200, initial classification uncertainty factor 4,  
607 number of online-EM iterations 40, batch size per class 300. Objectively “good” (showing clear  
608 Fab and receptor density) class averages were selected for 3D classification. Class averages

609 that were not classified as “good”, but were clearly not ice contamination, were run through a  
610 second round of 2D classification with default settings except: number of 2D classes 200,  
611 number of online-EM iterations 40, batch size per class 300. All “saved” class averages from the  
612 second rounds of 2D classification in cryoSPARC were sent to 3D classification. These particles  
613 were subjected to two rounds of heterogeneous refinement in cryoSPARC that serves as a  
614 “trash collector”. Four initial models were used, three generated from an early round of ab initio  
615 model generation and our final apo-FPN-Fab45D8 structure. All initial models were filtered to  
616 30Å before refinement. Particles were unbinned and a final heterogeneous refinement was  
617 performed with three good initial models of apo-FPN-Fab45D8. Non-uniform refinement was run  
618 with default settings and no resolution limit, on the most populated class resulting in angle and  
619 shift assignments for 310,647 particles. The particles were exported into RELION format using  
620 `csparc.py`, converted into an image stack, and imported into `cisTEM`<sup>65</sup> as a refinement package.  
621 The particles were reconstructed and half-maps were generated using the “generate 3D”  
622 command. These half-maps, as well as the half-maps from cryoSPARC were run through our  
623 lab’s directional Fourier shell correlation (dFSC) program<sup>66</sup> clearly showing a more distributed  
624 range of views in the map generated by `cisTEM`. Maps were sharpened in `cisTEM`. Resolutions  
625 are reported using the FSC = 0.143 cut-off<sup>67</sup> and were estimated in cryoSPARC and `cisTEM`.  
626

### 627 **Model building and refinement**

628 For apo-FPN, a homology model of human FPN in the outward open state was built using  
629 `Modeller`<sup>68</sup>, with a previously determined X-ray crystal structure of outward open bbFPN (PDB  
630 ID: 5AYN)<sup>23</sup> as a template. After truncating putatively flexible regions (N-terminus, ICL3, ECL5,  
631 and C-terminus), the resulting model was fit into the 3.2 Å cryo-EM map of FPN:Fab45D8 using  
632 `Chimera`<sup>69</sup>. The initial template was manually rebuilt in `Coot`<sup>52</sup> and iteratively refined with real  
633 space refinement implemented in `Phenix`<sup>53</sup>. Model geometry was assessed using `MolProbity`<sup>54</sup>.  
634 Further validation was performed with `EMRinger`<sup>70</sup> to compare the map and final model.  
635 Map-to-model FSCs were calculated within `Phenix`. Figures were prepared in `Chimera`<sup>69</sup> and  
636 `PyMol`.

637

638 To dock hepcidin into the Co<sup>2+</sup>/hepcidin-bound and apo-FPN difference density, we used a  
639 previously determined X-ray crystal structure of hepcidin bound to a neutralizing Fab as a  
640 starting model<sup>21</sup>. Hepcidin, without the first two residues, was manually placed within the  
641 difference density in `Coot`, then real-space refined to conform to the difference density

642 with maintaining the disulfide connectivity and secondary structure observed in the  
643 starting model. The resulting model docked to FPN has an overall RMSD of 1.2 Å  
644 compared to the starting model for regions with defined secondary structure.

645

#### 646 **Molecular dynamics simulations**

647 The structure of the outward-open apo conformation of human FPN was used as the starting  
648 coordinates for all simulations. Three different conditions were simulated (Supplementary Table  
649 3): (1) the iron-absent condition, where no iron was added; (2) the iron-bound condition, where  
650 an Fe<sup>2+</sup> ion was placed in the proposed iron binding site 5.6 Å from D325 α-carbon, 6.9 Å from  
651 D504 α-carbon, and 7.8 Å from H507 α-carbon; (3) the iron-in-bulk-solvent condition, where 15  
652 Fe<sup>2+</sup> ions were placed randomly in the water box outside the protein using Dabble<sup>71</sup>.

653

654 Simulation coordinates were prepared by removing non-FPN molecules from the initial  
655 structure. Prime (Schrödinger) was used to model missing side chains, and neutral acetyl and  
656 methylamide groups were added to cap protein termini. The unresolved loops between  
657 TM6-TM7 and TM9-TM10 (residues 239-290 and 394-451 respectively, inclusively) were not  
658 modeled. The termini surrounding these loops were capped. PropKa was used to determine the  
659 dominant protonation state of all titratable residues at pH 7<sup>72,73</sup>. The structure was internally  
660 hydrated using Dowser<sup>74</sup>. Dabble was used to additionally fill the extracellular cavity<sup>71</sup>. The  
661 structure was aligned using the Orientation of Proteins in Membranes (OPM) server<sup>75</sup>.

662

663 Using Dabble, the protein was inserted into a pre-equilibrated  
664 1-palmitoyl-2-oleoylphosphatidylcholine (POPC) membrane bilayer. For all simulations except  
665 condition three (iron in bulk solvent), sodium and chloride ions were added at 150 mM to  
666 neutralize the system. For condition three, chloride ions were added to neutralize the system  
667 resulting in a concentration of 108 mM. A periodic box was used with dimensions 90 x 90 Å in  
668 the x-y plane and a water buffer of 10 Å above and below the protein to the periodic boundary.  
669 We used the CHARMM36m parameters for lipids, proteins, sodium and chloride ions, and the  
670 TIP3P model for waters<sup>76-78</sup>. The Fe<sup>2+</sup> Lennard-Jones parameters were obtained from Li *et. al.*'s  
671 compromise model<sup>79</sup>.

672

673 All simulations were run on a single Graphical Processing Unit (GPU) using the Amber18  
674 Compute Unified Device Architecture (CUDA) version of particle-mesh Ewald molecular

675 dynamics (PMEMD)<sup>80,81</sup>. For each condition, 6 replicates were run. For each independent  
676 replicate, the system was minimized with 500 steps of steepest descent followed by 500 steps  
677 of conjugate gradient descent three times. 10 and 5 kcal mol<sup>-1</sup> · Å<sup>2</sup> harmonic restraints were used  
678 on the protein, lipid, and Fe<sup>2+</sup> ions for the first and second minimization, respectively. 1 kcal  
679 mol<sup>-1</sup> · Å<sup>2</sup> harmonic restraints were used on the protein and Fe<sup>2+</sup> ions for the final minimization.  
680 The system was then heated from 0 K to 100 K over 12.5 ps in the NVP ensemble with a  
681 Langevin thermostat and harmonically restraining the protein heavy atoms and Fe<sup>2+</sup> ions with a  
682 restraint of 10 kcal mol<sup>-1</sup> · Å<sup>2</sup>. The system was further heated with the same restraints from 100 K  
683 to 310 K in the NPT ensemble over 125 ps. The system was equilibrated with harmonic  
684 restraints on protein heavy atoms and Fe<sup>2+</sup> ions for 30 ns. The restraint strength started at 5 kcal  
685 mol<sup>-1</sup> · Å<sup>2</sup> and was reduced by 1 kcal mol<sup>-1</sup> · Å<sup>2</sup> every 2 ns for the first 10 ns and then by 0.1 kcal  
686 mol<sup>-1</sup> · Å<sup>2</sup> every 2 ns for the final 20 ns. Production simulations were performed at 310 K and 1  
687 bar using the NPT ensemble, a Langevin thermostat and a Monte Carlo barostat. Every 200 ps  
688 snapshots were saved. All simulations were run for at least 2.2 μs. These simulations used a  
689 4-fs time step with hydrogen mass repartitioning<sup>82</sup>. Bond lengths to hydrogen atoms were  
690 constrained using SHAKE<sup>82,83</sup>. Non-bonded interactions were cut off at 9 Å.

691

## 692 **Simulation Analysis Methods**

693 MD snapshots were reimaged every 1 ns and centered using CPPTRAJ package in  
694 AmberTools<sup>18</sup><sup>84</sup>. Simulations were visualized using Visual Molecular Dynamics and figures  
695 prepared in PyMOL<sup>85</sup>. Time traces from simulation were smoothed using a moving average with  
696 a window size of 15 ns unless otherwise indicated and visualized with the PyPlot package from  
697 Matplotlib. For all analysis in the manuscript that required structural alignment, we aligned to the  
698 initial Ferroportin structure using the backbone atoms of residues 26-116, 127-228, 308-483,  
699 and 492-543.

700

701 To investigate the localization of Fe<sup>2+</sup> ions, the iron-in-bulk-solvent simulations (condition 3) were  
702 analyzed. To visualize the density of Fe<sup>2+</sup> ions, the position of Fe<sup>2+</sup> ions was recorded every 10  
703 ns for each of the 6 simulation replicates, each 2 μs in length. Each Fe<sup>2+</sup> ion position was then  
704 drawn as a point superimposed on the starting structure (Fig. 3d). To quantify the binding  
705 events, the distance between iron and the closest side chain oxygen atom on D325 was  
706 measured. This distance was graphed over 1.2 μs, including the equilibration time (Fig. 3d).

707

708 To investigate the dynamics and conformation of the TM7b region, the iron-absent (condition 1)  
709 and iron-bound (condition 2) simulations were compared. The TM1-TM7b distance was  
710 measured using distance between the C $\alpha$  of V51 and the C $\alpha$  of Y333. For each simulation, we  
711 calculated the average of the distance over 2.2  $\mu$ s, excluding equilibration. The average over  
712 the simulations for each condition was plotted with error bars representing the standard error of  
713 the mean (s.e.m.) (Supplementary Fig. 7). The dynamics of D325 were also investigated. The  
714 dynamics were visualized by overlaying representative frames showing the movement of D325,  
715 the binding site, and TM7b. For iron-absent simulations, frames from a single replicate at 200,  
716 350, 500, and 550 ns were overlaid (Supplementary Fig. 7). For iron-bound simulations, frames  
717 from a single replicate at 200, 500, 725, 1000 ns were overlaid (Supplementary Fig. 7). The  
718 conformational range of D325 was quantified by measuring the distance between C $\gamma$  of D325  
719 and C $\beta$  of S47. This was visualized for one replicate for each condition over a time of 1  $\mu$ s  
720 inclusive of equilibration (Supplementary Fig. 7). For each independent replicate, the mean of  
721 the C $\gamma$  D325 - C $\beta$  S47 distance was calculated over 2.2  $\mu$ s. For each condition, the average  
722 over the replicates was plotted with error bars representing the s.e.m. (Supplementary Fig. 7).  
723 The flexibility of D325 was quantified by calculating the root-mean-square fluctuation (RMSF) of  
724 the side-chain atoms of D325 using an in-house script (Supplementary Fig. 7). Statistical  
725 significance was determined using the Mann-Whitney U test.

726

727

### 728 **Data Availability**

729 All data generated or analyzed during this study are included in this published article and its  
730 Supplementary Information. Crystallographic coordinates and structure factors for the Fab45D8  
731 complex have been deposited in the Protein Data Bank under accession code 6W4V.  
732 Coordinates for Fab45D8-FPN complex have been deposited in the Protein Data Bank under  
733 accession code 6W4S and the maps have been deposited in the Electron Microscopy Data  
734 Bank under accession code 21539. Coordinates for the FPN-Co<sup>2+</sup>-hepcidin-Fab45D8 complex  
735 have been deposited in the Protein Data Bank under accession code 6WBV and the maps have  
736 been deposited in the Electron Microscopy Data Bank under accession code 21599.

737

### 738 **Conflict of Interest**

739 Tara Arvedson is employed by Amgen and reports Amgen stock. None of the other authors  
740 report conflicts of interest.



## 741 REFERENCES

- 742 1. Drakesmith, H., Nemeth, E. & Ganz, T. Ironing out Ferroportin. *Cell Metab.* **22**, 777–787 (2015).
- 743 2. Donovan, A. *et al.* The iron exporter ferroportin/Slc40a1 is essential for iron homeostasis. *Cell Metab.*  
744 **1**, 191–200 (2005).
- 745 3. Donovan, A. *et al.* Positional cloning of zebrafish ferroportin1 identifies a conserved vertebrate iron  
746 exporter. *Nature* **403**, 776–781 (2000).
- 747 4. Knutson, M. D., Oukka, M., Koss, L. M., Aydemir, F. & Wessling-Resnick, M. Iron release from  
748 macrophages after erythrophagocytosis is up-regulated by ferroportin 1 overexpression and  
749 down-regulated by hepcidin. *Proc. Natl. Acad. Sci. U. S. A.* **102**, 1324–1328 (2005).
- 750 5. Ward, D. M. & Kaplan, J. Ferroportin-mediated iron transport: expression and regulation. *Biochim.*  
751 *Biophys. Acta* **1823**, 1426–1433 (2012).
- 752 6. Aschemeyer, S. *et al.* Structure-function analysis of ferroportin defines the binding site and an  
753 alternative mechanism of action of hepcidin. *Blood, The Journal of the American Society of*  
754 *Hematology* **131**, 899–910 (2018).
- 755 7. Nemeth, E. *et al.* Hepcidin regulates cellular iron efflux by binding to ferroportin and inducing its  
756 internalization. *Science* **306**, 2090–2093 (2004).
- 757 8. De Domenico, I. *et al.* The molecular mechanism of hepcidin-mediated ferroportin down-regulation.  
758 *Mol. Biol. Cell* **18**, 2569–2578 (2007).
- 759 9. Qiao, B. *et al.* Hepcidin-induced endocytosis of ferroportin is dependent on ferroportin ubiquitination.  
760 *Cell Metab.* **15**, 918–924 (2012).
- 761 10. Ross, S. L. *et al.* Molecular mechanism of hepcidin-mediated ferroportin internalization requires  
762 ferroportin lysines, not tyrosines or JAK-STAT. *Cell Metab.* **15**, 905–917 (2012).
- 763 11. Roetto, A. *et al.* Mutant antimicrobial peptide hepcidin is associated with severe juvenile  
764 hemochromatosis. *Nat. Genet.* **33**, 21–22 (2003).
- 765 12. De Domenico, I. *et al.* The molecular basis of ferroportin-linked hemochromatosis. *Proc. Natl. Acad.*  
766 *Sci. U. S. A.* **102**, 8955–8960 (2005).

- 767 13. Drakesmith, H. *et al.* Resistance to hepcidin is conferred by hemochromatosis-associated mutations  
768 of ferroportin. *Blood* **106**, 1092–1097 (2005).
- 769 14. Roy, C. N. *et al.* Hepcidin antimicrobial peptide transgenic mice exhibit features of the anemia of  
770 inflammation. *Blood* **109**, 4038–4044 (2007).
- 771 15. Ganz, T. & Nemeth, E. The hepcidin-ferroportin system as a therapeutic target in anemias and iron  
772 overload disorders. *Hematology Am. Soc. Hematol. Educ. Program* **2011**, 538–542 (2011).
- 773 16. Manolova, V. *et al.* Oral ferroportin inhibitor ameliorates ineffective erythropoiesis in a model of  
774  $\beta$ -thalassemia. *J. Clin. Invest.* (2019) doi:10.1172/JCI129382.
- 775 17. Witcher, D. R. *et al.* LY2928057, an antibody targeting ferroportin, is a potent inhibitor of hepcidin  
776 activity and increases iron mobilization in normal cynomolgus monkeys. (2013).
- 777 18. Crielaard, B. J., Lammers, T. & Rivella, S. Targeting iron metabolism in drug discovery and delivery.  
778 *Nat. Rev. Drug Discov.* **16**, 400–423 (2017).
- 779 19. Vlasveld, L. T. *et al.* Twenty Years of Ferroportin Disease: A Review or An Update of Published  
780 Clinical, Biochemical, Molecular, and Functional Features. *Pharmaceuticals* **12**, (2019).
- 781 20. Nemeth, E. *et al.* The N-terminus of hepcidin is essential for its interaction with ferroportin:  
782 structure-function study. *Blood* **107**, 328–333 (2006).
- 783 21. Jordan, J. B. *et al.* Hepcidin revisited, disulfide connectivity, dynamics, and structure. *J. Biol. Chem.*  
784 **284**, 24155–24167 (2009).
- 785 22. Bonaccorsi di Patti, M. C. *et al.* A structural model of human ferroportin and of its iron binding site.  
786 *FEBS J.* **281**, 2851–2860 (2014).
- 787 23. Taniguchi, R. *et al.* Outward- and inward-facing structures of a putative bacterial transition-metal  
788 transporter with homology to ferroportin. *Nat. Commun.* **6**, 8545 (2015).
- 789 24. Deshpande, C. N. *et al.* Calcium is an essential cofactor for metal efflux by the ferroportin transporter  
790 family. *Nat. Commun.* **9**, 3075 (2018).
- 791 25. Ross, S. L. *et al.* Identification of Antibody and Small Molecule Antagonists of Ferroportin-Hepcidin  
792 Interaction. *Front. Pharmacol.* **8**, 838 (2017).
- 793 26. Wu, S. *et al.* Fabs enable single particle cryoEM studies of small proteins. *Structure* **20**, 582–592



- 794 (2012).
- 795 27. Mitchell, C. J., Shawki, A., Ganz, T., Nemeth, E. & Mackenzie, B. Functional properties of human  
796 ferroportin, a cellular iron exporter reactive also with cobalt and zinc. *Am. J. Physiol. Cell Physiol.*  
797 **306**, C450–9 (2014).
- 798 28. Guellec, J. *et al.* Molecular model of the ferroportin intracellular gate and implications for the human  
799 iron transport cycle and hemochromatosis type 4A. *FASEB J.* **33**, 14625–14635 (2019).
- 800 29. Sham, R. L. *et al.* Autosomal dominant hereditary hemochromatosis associated with a novel  
801 ferroportin mutation and unique clinical features. *Blood Cells Mol. Dis.* **34**, 157–161 (2005).
- 802 30. Schimanski, L. M. *et al.* In vitro functional analysis of human ferroportin (FPN) and  
803 hemochromatosis-associated FPN mutations. *Blood* **105**, 4096–4102 (2005).
- 804 31. Viprakasit, V. *et al.* Molecular Diagnosis of the First Ferroportin Mutation (C326Y) in the Far East  
805 Causing a Dominant Form of Inherited Iron Overload. (2004).
- 806 32. Mayr, R. *et al.* Identification of mutations in SLC40A1 that affect ferroportin function and phenotype of  
807 human ferroportin iron overload. *Gastroenterology* **140**, 2056–63, 2063.e1 (2011).
- 808 33. Tortosa, V., di Patti, M. C. B., Brandi, V., Musci, G. & Polticelli, F. An improved structural model of the  
809 human iron exporter ferroportin. Insight into the role of pathogenic mutations in hereditary  
810 hemochromatosis type 4. *Bio-Algorithms and Med-Systems* **13**, 215–222 (2017).
- 811 34. Wallace, D. F., Clark, R. M., Harley, H. A. J. & Nathan Subramaniam, V. Autosomal dominant iron  
812 overload due to a novel mutation of ferroportin1 associated with parenchymal iron loading and  
813 cirrhosis. *Journal of Hepatology* vol. 40 710–713 (2004).
- 814 35. Njajou, O. T. *et al.* A mutation in SLC11A3 is associated with autosomal dominant hemochromatosis.  
815 *Nat. Genet.* **28**, 213–214 (2001).
- 816 36. Arden, K. E. *et al.* A novel mutation in ferroportin1 is associated with haemochromatosis in a  
817 Solomon Islands patient. *Gut* **52**, 1215–1217 (2003).
- 818 37. Zhang, W. *et al.* A novel SLC40A1 p.Y333H mutation with gain of function of ferroportin: A recurrent  
819 cause of haemochromatosis in China. *Liver Int.* **39**, 1120–1127 (2019).
- 820 38. Létocart, E. *et al.* A novel missense mutation in SLC40A1 results in resistance to hepcidin and

- 821 confirms the existence of two ferroportin-associated iron overload diseases. *Br. J. Haematol.* **147**,  
822 379–385 (2009).
- 823 39. Callebaut, I. *et al.* Comprehensive functional annotation of 18 missense mutations found in  
824 suspected hemochromatosis type 4 patients. *Hum. Mol. Genet.* **23**, 4479–4490 (2014).
- 825 40. Preza, G. C. *et al.* Minihepcidins are rationally designed small peptides that mimic hepcidin activity in  
826 mice and may be useful for the treatment of iron overload. *J. Clin. Invest.* **121**, 4880–4888 (2011).
- 827 41. Rivard, S. R. *et al.* Autosomal dominant reticuloendothelial iron overload (HFE type 4) due to a new  
828 missense mutation in the FERROPORTIN 1 gene (SLC11A3) in a large French-Canadian family.  
829 *Haematologica* **88**, 824–826 (2003).
- 830 42. Raszeja-Wyszomirska, J., Caleffi, A., Milkiewicz, P. & Pietrangelo, A. Ferroportin-related  
831 haemochromatosis associated with novel Y64H mutation of the SCL40A1 gene. *Prz Gastroenterol* **9**,  
832 307–309 (2014).
- 833 43. Clark, R. J. *et al.* Understanding the structure/activity relationships of the iron regulatory peptide  
834 hepcidin. *Chem. Biol.* **18**, 336–343 (2011).
- 835 44. Smythe, M. L. *et al.* Hepcidin analogues and uses thereof. *US Patent* (2017).
- 836 45. Bourne, G. T., Smythe, M. L., Frederick, B. T. & Vink, S. Hepcidin and mini-hepcidin analogues and  
837 uses thereof. *US Patent* (2020).
- 838 46. Galesloot, T. E. *et al.* Serum hepcidin: reference ranges and biochemical correlates in the general  
839 population. *Blood* **117**, e218–25 (2011).
- 840 47. Nasr, M. L. *et al.* Covalently circularized nanodiscs for studying membrane proteins and viral entry.  
841 *Nat. Methods* **14**, 49–52 (2017).
- 842 48. Winter, G., Lobley, C. M. C. & Prince, S. M. Decision making in xia2. *Acta Crystallogr. D Biol.*  
843 *Crystallogr.* **69**, 1260–1273 (2013).
- 844 49. Kabsch, W. XDS. *Acta Crystallogr. D Biol. Crystallogr.* **66**, 125–132 (2010).
- 845 50. McCoy, A. J. *et al.* Phaser crystallographic software. *J. Appl. Crystallogr.* **40**, 658–674 (2007).
- 846 51. Aleman, F. *et al.* Immunogenetic and structural analysis of a class of HCV broadly neutralizing  
847 antibodies and their precursors. *Proc. Natl. Acad. Sci. U. S. A.* **115**, 7569–7574 (2018).

- 848 52. Emsley, P. & Cowtan, K. Coot: model-building tools for molecular graphics. *Acta Crystallogr. D Biol.*  
849 *Crystallogr.* **60**, 2126–2132 (2004).
- 850 53. Adams, P. D. *et al.* PHENIX: a comprehensive Python-based system for macromolecular structure  
851 solution. *Acta Crystallogr. D Biol. Crystallogr.* **66**, 213–221 (2010).
- 852 54. Chen, V. B. *et al.* MolProbity: all-atom structure validation for macromolecular crystallography. *Acta*  
853 *Crystallogr. D Biol. Crystallogr.* **66**, 12–21 (2010).
- 854 55. Cote, L. J., Kim, F. & Huang, J. Langmuir- Blodgett assembly of graphite oxide single layers. *J. Am.*  
855 *Chem. Soc.* **131**, 1043–1049 (2009).
- 856 56. Palovcak, E. *et al.* A simple and robust procedure for preparing graphene-oxide cryo-EM grids. *J.*  
857 *Struct. Biol.* **204**, 80–84 (2018).
- 858 57. Wang, F. *et al.* Amino and PEG-amino graphene oxide grids enrich and protect samples for  
859 high-resolution single particle cryo-electron microscopy. *J. Struct. Biol.* **209**, 107437 (2020).
- 860 58. Mastronarde, D. N. SerialEM: A Program for Automated Tilt Series Acquisition on Tecnai  
861 Microscopes Using Prediction of Specimen Position. *Microsc. Microanal.* **9**, 1182–1183 (2003).
- 862 59. Zheng, S. Q. *et al.* MotionCor2: anisotropic correction of beam-induced motion for improved  
863 cryo-electron microscopy. *Nat. Methods* **14**, 331–332 (2017).
- 864 60. de la Rosa-Trevín, J. M. *et al.* Scipion: A software framework toward integration, reproducibility and  
865 validation in 3D electron microscopy. *J. Struct. Biol.* **195**, 93–99 (2016).
- 866 61. Punjani, A., Rubinstein, J. L., Fleet, D. J. & Brubaker, M. A. cryoSPARC: algorithms for rapid  
867 unsupervised cryo-EM structure determination. *Nat. Methods* **14**, 290–296 (2017).
- 868 62. Scheres, S. H. W. RELION: implementation of a Bayesian approach to cryo-EM structure  
869 determination. *J. Struct. Biol.* **180**, 519–530 (2012).
- 870 63. Rohou, A. & Grigorieff, N. CTFFIND4: Fast and accurate defocus estimation from electron  
871 micrographs. *J. Struct. Biol.* **192**, 216–221 (2015).
- 872 64. Asarnow, D., Palovcak, E. & Cheng, Y. *asarnow/pyem: UCSF pyem v0.5.* (2019).  
873 doi:10.5281/zenodo.3576630.
- 874 65. Grant, T., Rohou, A. & Grigorieff, N. cisTEM, user-friendly software for single-particle image

- 875 processing. *Elife* **7**, (2018).
- 876 66. Dang, S. *et al.* Cryo-EM structures of the TMEM16A calcium-activated chloride channel. *Nature* **552**,  
877 426–429 (2017).
- 878 67. Rosenthal, P. B. & Henderson, R. Optimal determination of particle orientation, absolute hand, and  
879 contrast loss in single-particle electron cryomicroscopy. *J. Mol. Biol.* **333**, 721–745 (2003).
- 880 68. Eswar, N. *et al.* Comparative protein structure modeling using MODELLER. *Curr. Protoc. Protein Sci.*  
881 **Chapter 2**, Unit 2.9 (2007).
- 882 69. Goddard, T. D., Huang, C. C. & Ferrin, T. E. Visualizing density maps with UCSF Chimera. *J. Struct.*  
883 *Biol.* **157**, 281–287 (2007).
- 884 70. Barad, B. A. *et al.* EMRinger: side chain-directed model and map validation for 3D cryo-electron  
885 microscopy. *Nat. Methods* **12**, 943–946 (2015).
- 886 71. Betz, R. *Dabble*. (2017). doi:10.5281/zenodo.836914.
- 887 72. Olsson, M. H. M., Søndergaard, C. R., Rostkowski, M. & Jensen, J. H. PROPKA3: Consistent  
888 Treatment of Internal and Surface Residues in Empirical pKa Predictions. *J. Chem. Theory Comput.*  
889 **7**, 525–537 (2011).
- 890 73. Søndergaard, C. R., Olsson, M. H. M., Rostkowski, M. & Jensen, J. H. Improved Treatment of  
891 Ligands and Coupling Effects in Empirical Calculation and Rationalization of pKa Values. *J. Chem.*  
892 *Theory Comput.* **7**, 2284–2295 (2011).
- 893 74. Morozenko, A. & Stuchebrukhov, A. A. Dowser , a new method of hydrating protein structures.  
894 *Proteins: Structure, Function, and Bioinformatics* vol. 84 1347–1357 (2016).
- 895 75. Lomize, M. A., Lomize, A. L., Pogozheva, I. D. & Mosberg, H. I. OPM: orientations of proteins in  
896 membranes database. *Bioinformatics* **22**, 623–625 (2006).
- 897 76. Klauda, J. B. *et al.* Update of the CHARMM all-atom additive force field for lipids: validation on six  
898 lipid types. *J. Phys. Chem. B* **114**, 7830–7843 (2010).
- 899 77. Huang, J. *et al.* CHARMM36m: an improved force field for folded and intrinsically disordered  
900 proteins. *Nat. Methods* **14**, 71–73 (2017).
- 901 78. Beglov, D. & Roux, B. Finite representation of an infinite bulk system: Solvent boundary potential for

- 902 computer simulations. *J. Chem. Phys.* **100**, 9050–9063 (1994).
- 903 79. Li, P., Roberts, B. P., Chakravorty, D. K. & Merz, K. M., Jr. Rational design of particle mesh Ewald  
904 compatible Lennard-Jones parameters for+ 2 metal cations in explicit solvent. *J. Chem. Theory  
905 Comput.* **9**, 2733–2748 (2013).
- 906 80. Case, D. A. *et al.* AMBER 2018; 2018. *University of California, San Francisco*.
- 907 81. Salomon-Ferrer, R., Götz, A. W., Poole, D., Le Grand, S. & Walker, R. C. Routine Microsecond  
908 Molecular Dynamics Simulations with AMBER on GPUs. 2. Explicit Solvent Particle Mesh Ewald. *J.  
909 Chem. Theory Comput.* **9**, 3878–3888 (2013).
- 910 82. Hopkins, C. W., Le Grand, S., Walker, R. C. & Roitberg, A. E. Long-Time-Step Molecular Dynamics  
911 through Hydrogen Mass Repartitioning. *J. Chem. Theory Comput.* **11**, 1864–1874 (2015).
- 912 83. Ryckaert, J.-P., Ciccotti, G. & Berendsen, H. J. C. Numerical integration of the cartesian equations of  
913 motion of a system with constraints: molecular dynamics of n-alkanes. *J. Comput. Phys.* **23**, 327–341  
914 (1977).
- 915 84. Roe, D. R. & Cheatham, T. E., 3rd. PTRAJ and CPPTRAJ: Software for Processing and Analysis of  
916 Molecular Dynamics Trajectory Data. *J. Chem. Theory Comput.* **9**, 3084–3095 (2013).
- 917 85. Humphrey, W., Dalke, A. & Schulten, K. VMD: visual molecular dynamics. *J. Mol. Graph.* **14**, 33–8,  
918 27–8 (1996).
- 919
