# Supplementary material for: Structure of human ferroportin reveals molecular basis of iron homeostasis
Source: bioRxiv or medRxiv preprint supplement (doi:10.1101/2020.03.16.993006), 2020-03-18
Supplement: Supplementary file [file media-1.pdf]

920 **SUPPLEMENTARY INFORMATION**

921

922 **Structure of human ferroportin reveals molecular basis of iron homeostasis**

923

924 Christian B. Billesboelle<sup>1\*</sup>, Caleigh M. Azumaya<sup>2\*</sup>, Rachael C. Kretsch<sup>3-7</sup>, Alex S. Powers<sup>3-7</sup>,  
925 Shane Gonen<sup>2,8,9</sup>, Simon Schneider<sup>10</sup>, Tara Arvedson<sup>11</sup>, Ron O. Dror<sup>3-7</sup>, Yifan Cheng<sup>2,8</sup>, Aashish  
926 Manglik<sup>1,2</sup>

927

928 <sup>1</sup>Department of Pharmaceutical Chemistry, University of California, San Francisco, 1700 4th  
929 Street, San Francisco, CA 94158, USA.

930 <sup>2</sup>Department of Biochemistry and Biophysics, University of California, San Francisco, 600 16th  
931 Street, San Francisco, CA 94158, USA.

932 <sup>3</sup>Department of Molecular and Cellular Physiology, Stanford University School of Medicine,  
933 Stanford, CA 94305, USA

934 <sup>4</sup>Department of Structural Biology, Stanford University School of Medicine, Stanford, CA 94305,  
935 USA

936 <sup>5</sup>Department of Computer Science, Stanford University, Stanford, CA 94305, USA

937 <sup>6</sup>Institute for Computational and Mathematical Engineering, Stanford University, Stanford, CA  
938 94305, USA

939 <sup>7</sup>Biophysics Program, Stanford University, Stanford, CA 94305, USA

940 <sup>8</sup>Howard Hughes Medical Institute, University of California San Francisco, San Francisco, CA,  
941 USA

942 <sup>9</sup>Present address: Department of Molecular Biology and Biochemistry, University of California,  
943 Irvine, 2224 Biological Sciences III, Irvine, CA 92697, USA

944 <sup>10</sup>Institute of Biochemistry, Goethe University Frankfurt, Max-von-Laue-Straße 9, 60438  
945 Frankfurt am Main, Germany

946 <sup>11</sup>Department of Oncology Research, Amgen Inc., South San Francisco, CA, United States

947 <sup>12</sup>Department of Anesthesia and Perioperative Care, University of California, San Francisco,  
948 1700 4th Street, San Francisco, CA 94158, USA.

949

950 \* These authors contributed equally

951 Correspondence to Yifan Cheng (Yifan.Cheng@ucsf.edu) or Aashish Manglik  
952 (Aashish.Manglik@ucsf.edu)

953

954

955

956

957 SUPPLEMENTARY FIGURES

a

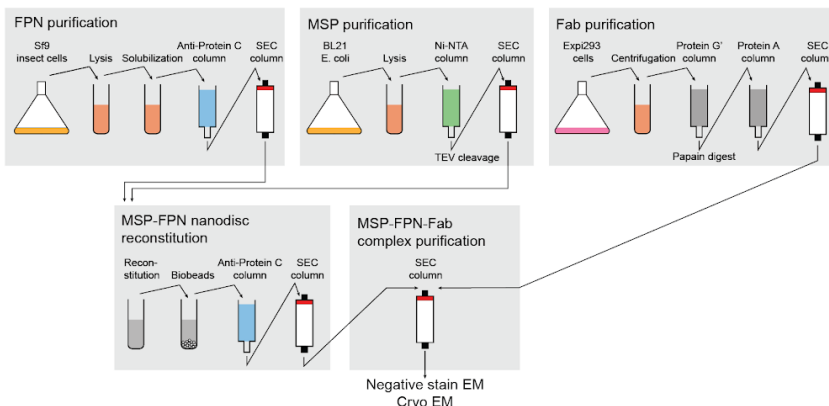

b

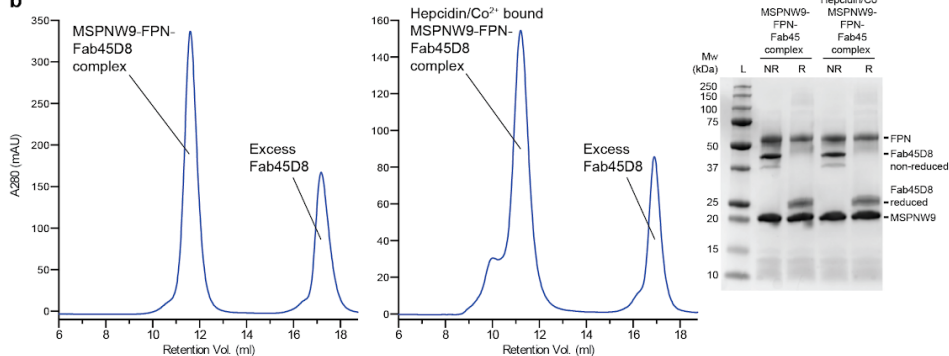

c

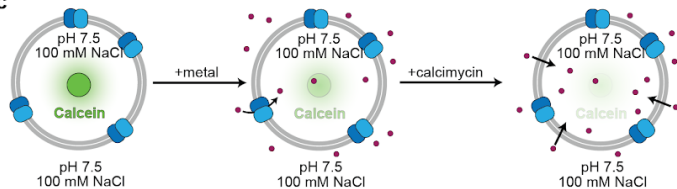

d

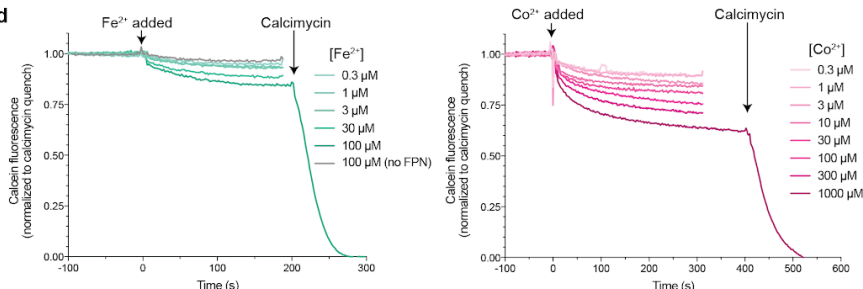

959 **Supplementary Figure 1. Biochemistry of purified human ferroportin.** a, Purification  
 960 scheme for nanodisc-reconstituted FPN bound to Fab45D8 for cryo-EM studies. b, Size  
 961 exclusion chromatography of purified apo and hepcidin/Co<sup>2+</sup> bound FPN-Fab45D8 complex.  
 962 SDS-PAGE gel of purified complex under non-reducing (NR) and reducing (R) conditions. c,  
 963 Schematic of calcein-based assay to measure transport of divalent cations. Purified FPN is  
 964 reconstituted into proteoliposomes containing calcein. Addition of divalent cations leads to  
 965 quenching of calcein fluorescence. Addition of the divalent cation ionophore calcimycin fully  
 966 quenches calcein fluorescence. d, Reconstituted human FPN transports Fe<sup>2+</sup> and Co<sup>2+</sup>.

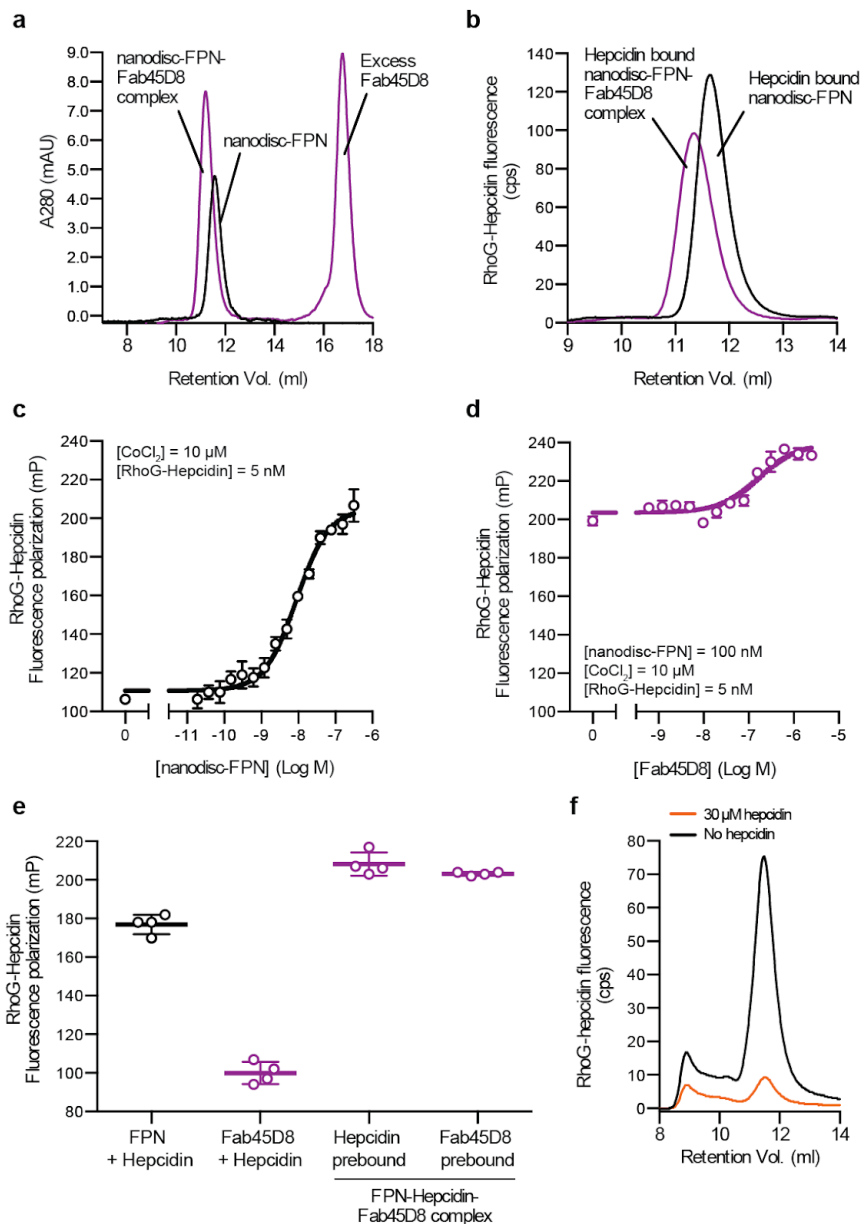

967

968 **Supplementary Figure 2. Characterization of Fab45D8.** **a**, Fab45D8 binds  
 969 nanodisc-reconstituted FPN (nanodisc-FPN), as assessed by size-exclusion chromatography. **b**,  
 970 Fluorescence size exclusion chromatography (FSEC) of rhodamine G hepcidin  
 971 (RhoG-hepcidin). RhoG-hepcidin co-elutes with nanodisc-FPN and with a  
 972 nanodisc-FPN:Fab45D8 complex. **c**, RhoG-hepcidin binding to nanodisc-FPN in the presence of  
 973 10  $\mu\text{M}$   $\text{CoCl}_2$  measured by fluorescence polarization reveals a  $K_D$  of 7.7 nM. **d**, Fluorescence  
 974 polarization of RhoG-hepcidin increases further with Fab45D8, consistent with formation of a  
 975 larger complex. Importantly, Fab45D8 does not decrease RhoG-hepcidin binding. **e**,  
 976 RhoG-hepcidin binds to FPN (FPN+hepcidin) but not to Fab45D8 alone (Fab45D8+hepcidin).  
 977 Order of hepcidin and Fab45D8 addition does not influence the increase in fluorescence  
 978 polarization for a Fab45D8-FPN-hepcidin complex. **f**, FSEC shows RhoG-hepcidin binding to  
 979 nanodisc-FPN is competed by excess unlabelled hepcidin used for structural studies.

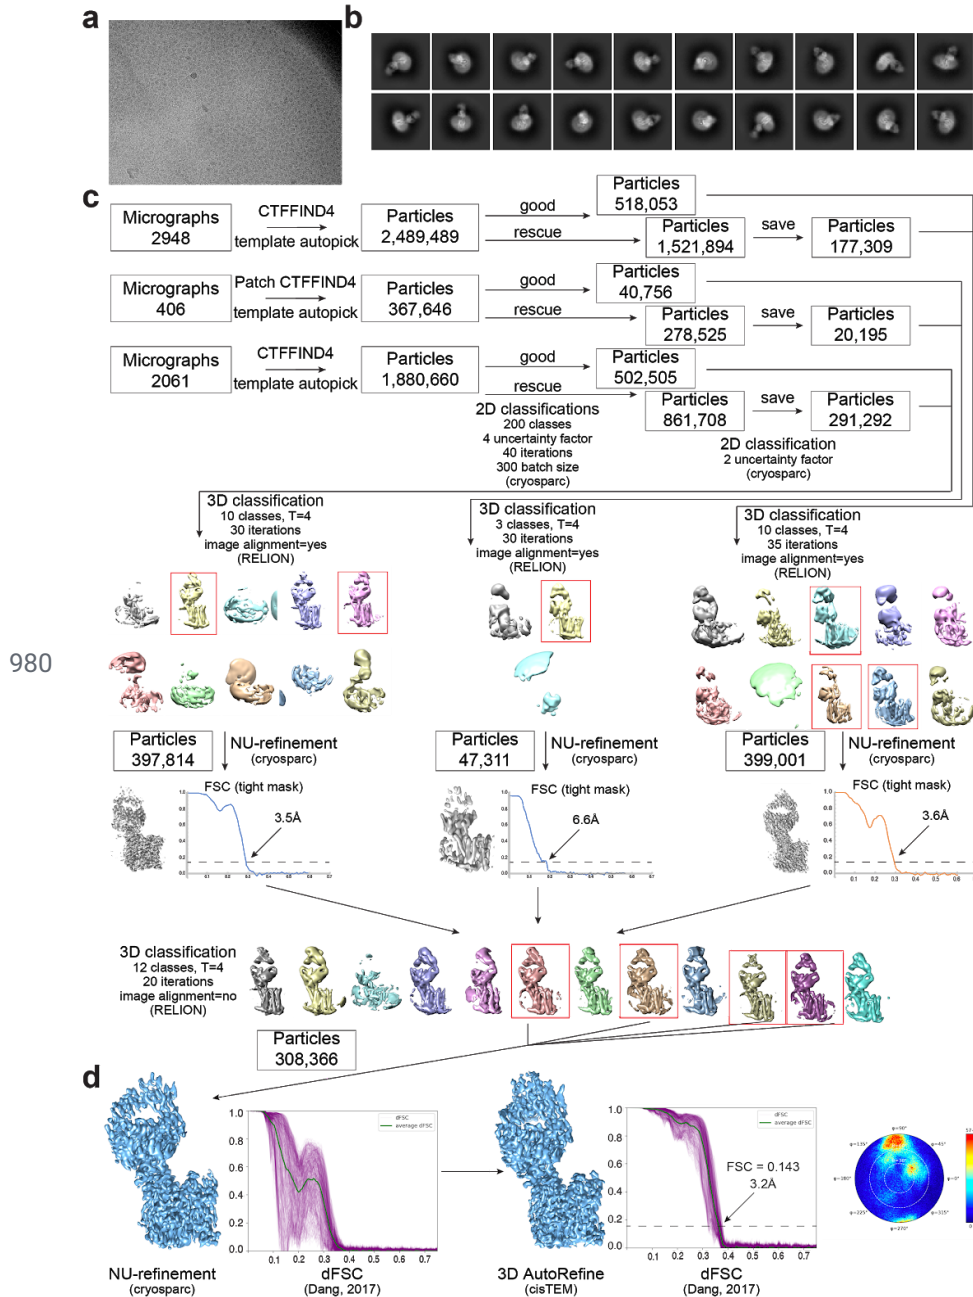

981 **Supplementary Figure 3. Cryo-EM data processing for FPN-Fab45D8.** **a**, Representative  
 982 motion-corrected micrograph collected on the Titan Krios showing monodisperse FPN-Fab45D8  
 983 nanodisc particles. **b**, Examples of “good” 2D class averages that were used in 3D  
 984 classification. **c**, Flowchart showing image processing pipeline for FPN-Fab45D8. Initial  
 985 processing, through 2D classification, was performed in cryoSPARC. Particles were then  
 986 transferred, using csparc2star.py, to RELION for 3D classification, then to cryoSPARC for a  
 987 nonuniform refinement, and finally to cisTEM for refinement. The number of particles moving  
 988 into each step are noted. **d**, Final refinements from cryosparc and cisTEM beside their  
 989 directional FSC curves calculated using dfsc.0.0.1.py. Angular distribution plot from cisTEM is  
 990 shown.

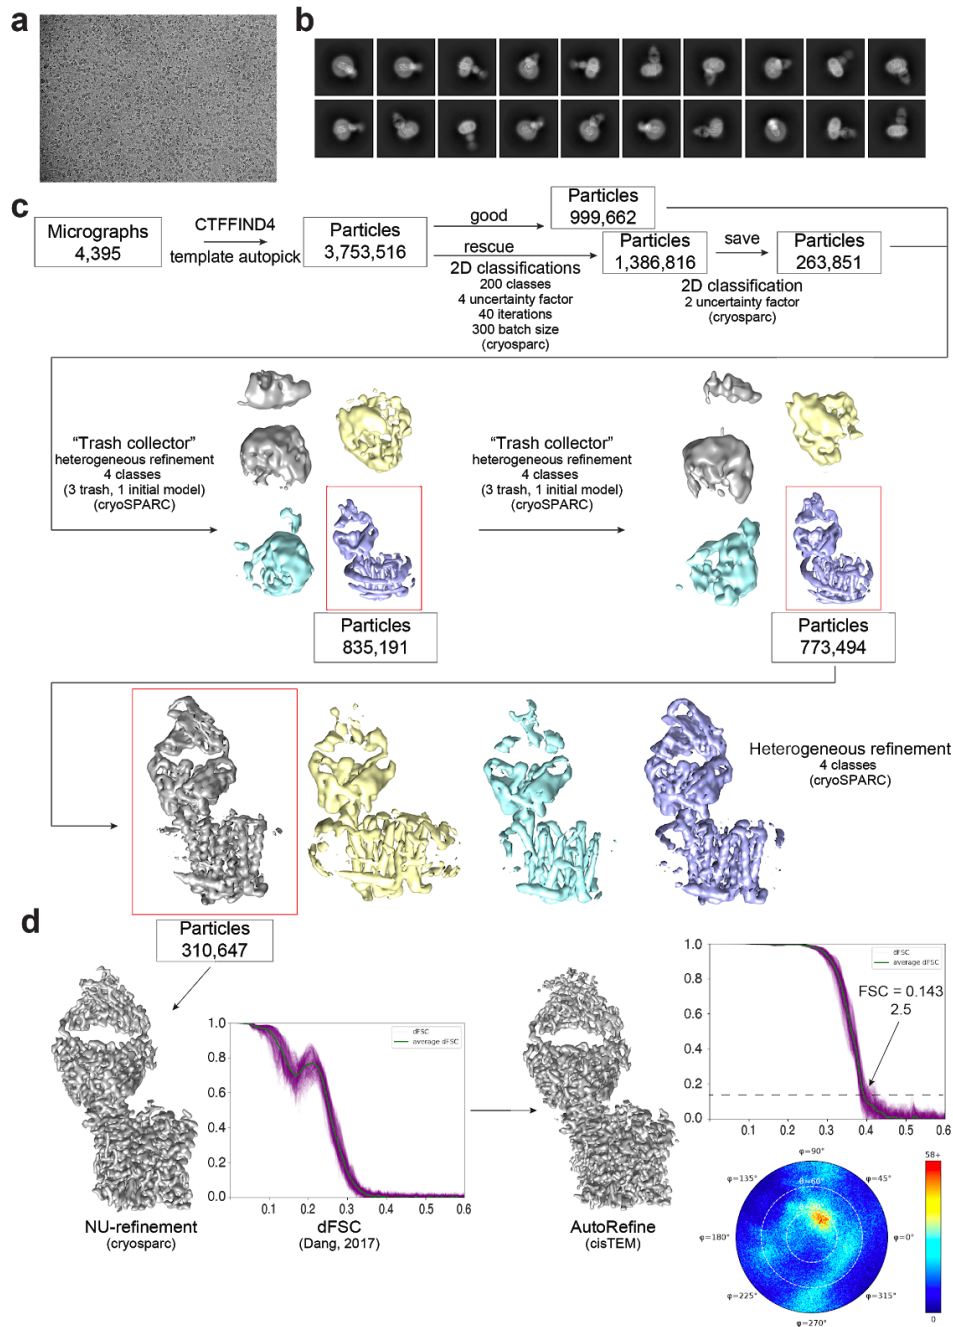

991

992 **Supplementary Figure 4. Cryo-EM data processing for Co<sup>2+</sup>-hepcidin-FPN-Fab45D8. a,**  
 993 **Representative motion-corrected micrograph collected on the Titan Krios showing**  
 994 **monodisperse Co<sup>2+</sup>-hepcidin-FPN-Fab45D8 nanodisc particles. b, Examples of “good” 2D class**  
 995 **averages that were used in 3D classification. c, Flowchart showing image processing pipeline**  
 996 **for Co<sup>2+</sup>-hepcidin-FPN-Fab45D8. Initial processing, through nonuniform refinement, was**  
 997 **performed in cryoSPARC. A final subset of particles were transferred to cisTEM for refinement.**  
 998 **The number of particles moving into each step are noted. d, Final refinements from cryoSPARC**  
 999 **and cisTEM beside their directional FSC curves calculated using dfsc.0.0.1.py. Angular**  
 1000 **distribution plot from cisTEM is also shown.**



1001

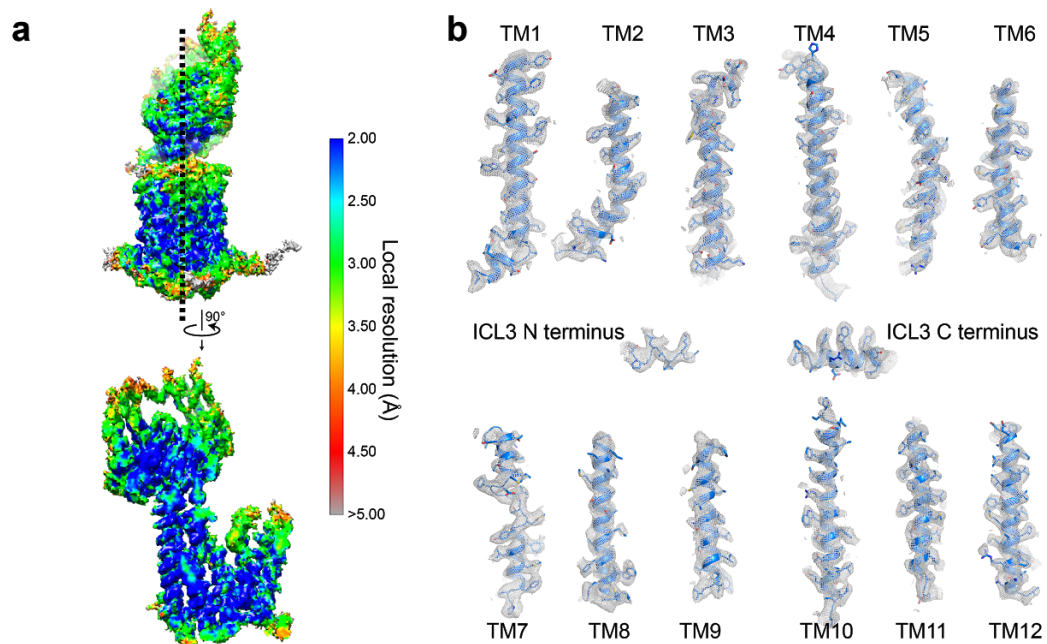

1002

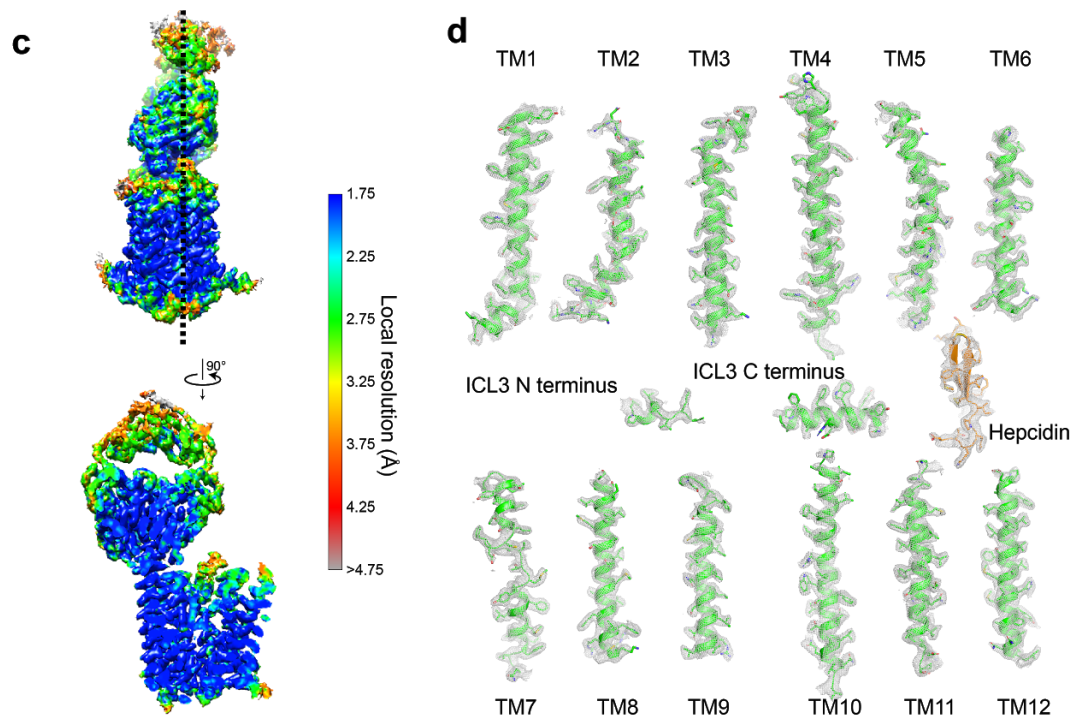

1003 **Supplementary Figure 5. Cryo-EM map density for FPN.** Local resolution estimation by  
 1004 ResMap for the apo-FPN-Fab45D8 complex (a) and for the Co<sup>2+</sup>-hepcidin-FPN-Fab45D8  
 1005 complex (c). Two views of each complex are shown. Shown in grey mesh is cryo-EM map  
 1006 density for individual FPN transmembrane helices for the apo-FPN-Fab45D8 complex (b) and  
 1007 for the Co<sup>2+</sup>-hepcidin-FPN-Fab45D8 complex (d). Mesh depicts density within a 2.5 Å radius of  
 1008 any modeled atom.  
 1009

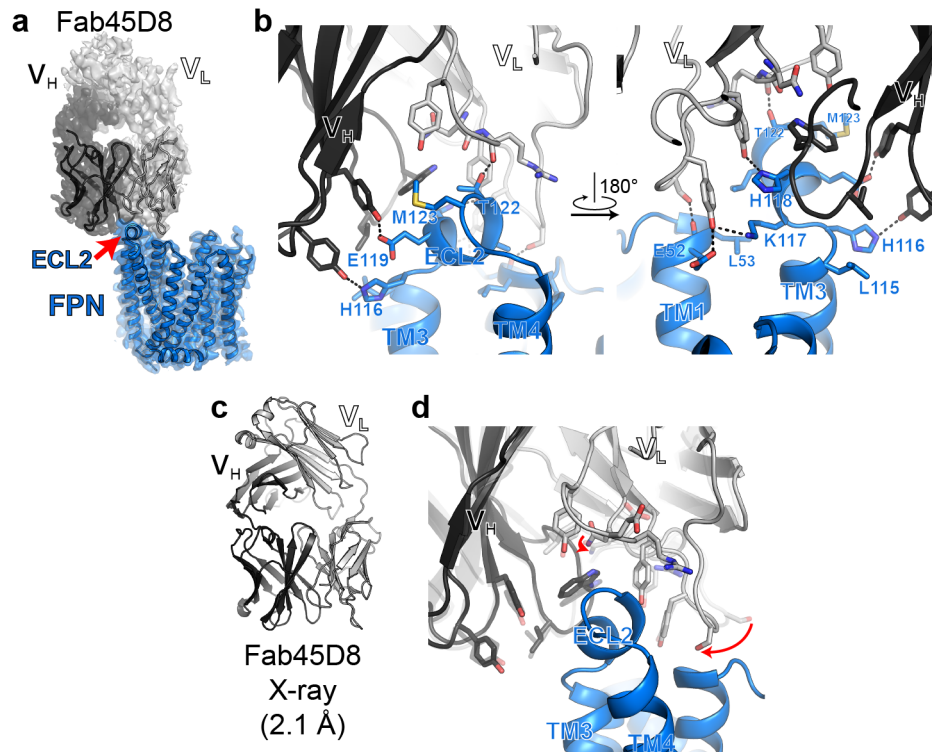

1010

1011 **Supplementary Figure 6. Structure of Fab45D8 and interaction with FPN.** **a**, Cryo-EM  
 1012 density of FPN and Fab45D8. Although density is observed for the constant regions of  
 1013 Fab45D8, it is not of sufficient quality to unambiguously model. **b**, Fab45D8 makes extensive  
 1014 contacts with FPN extracellular loop 2 (ECL2) with both the heavy (V<sub>H</sub>) and light (V<sub>L</sub>) chains. **c**,  
 1015 Crystal structure of Fab45D8 at 2.1 Å. **d**, Comparison of Fab45D8 alone (transparent cartoon  
 1016 and sticks) and bound to FPN. The binding site residues of Fab45D8 change minimally upon  
 1017 binding FPN.

1018

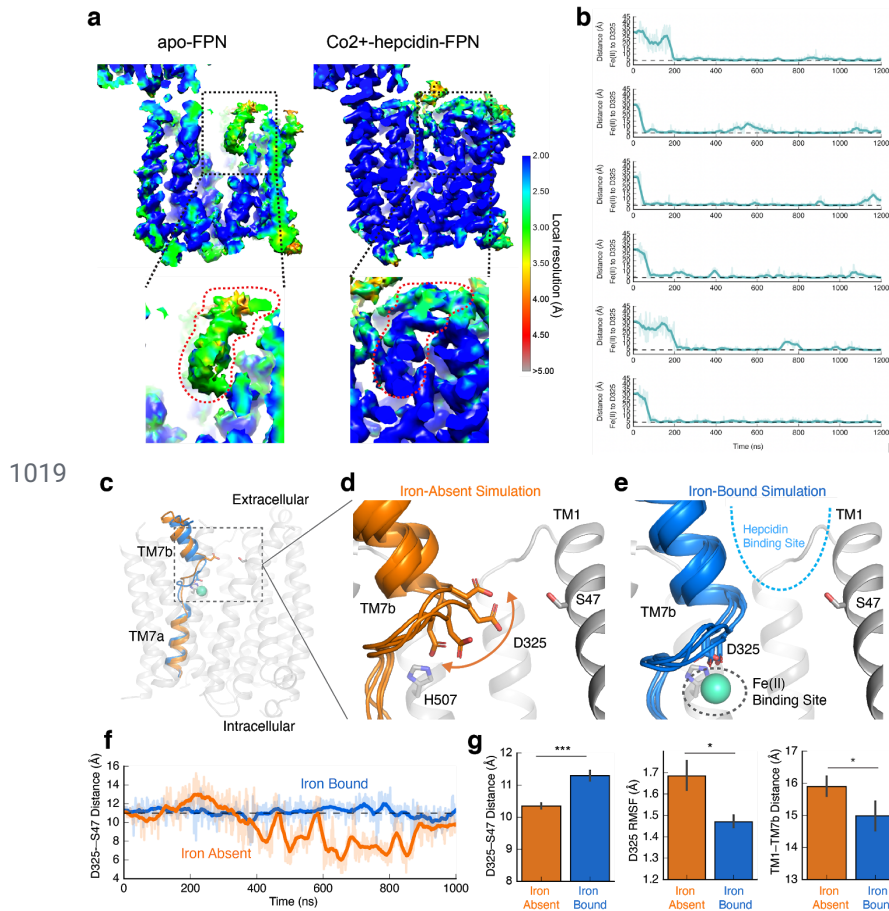

1019

1020 **Supplementary Figure 7. Molecular dynamics simulations of iron binding to apo FPN. a,**  
 1021 ResMap of FPN cryo-EM density. Insets show local resolution around TM7b. **b,** Each graph  
 1022 corresponds to an independent simulation where  $\text{Fe}^{2+}$  ions start in solution and bind  
 1023 spontaneously to the proposed iron binding site. Distance shown is from the ion to the nearest  
 1024 oxygen atom of the D325 side chain. Thick traces represent a 15-ns sliding mean and thin  
 1025 traces represent unsmoothed values. Timetraces include 30 ns of equilibration. The average  
 1026 time to bind (the time from start of production simulation to when the measured distance is less )  
 1027 was 71 ns. **c,** Representative conformations of TM7 from simulations with iron bound (blue) or  
 1028 absent (orange). **d,** In the absence of bound iron, D325 is mobile and can move into the cavity  
 1029 between TM7b and TM1. The top of TM7b can also tilt away from TM1. Four representative  
 1030 frames from simulation are overlaid. **e,** In simulations with  $\text{Fe}^{2+}$  bound, interaction with the ion  
 1031 restricts the mobility of D325 and, in turn, TM7b. **f,** Iron-bound and iron-absent simulations show  
 1032 differences in the dynamics and position of D325, as measured by the distance between D325  
 1033 C $\gamma$  and S47 C $\beta$ . **g,** Comparison of conformation and dynamics with and without iron bound. With  
 1034 iron bound, D325 moves away from TM1 into the iron binding site (left), the root-mean-square  
 1035 fluctuation (RMSF) of D325 decreases (middle), and the extracellular end of TM7b moves closer  
 1036 to TM1 (right). For these comparisons, 6 simulations for each condition were used, each 2.0  $\mu\text{s}$   
 1037 in length. Error bars are s.e.m. and p-values were calculated using Mann-Whitney U test (\*  
 1038  $p < 0.05$ , \*\*\*  $p < 0.001$ ).



1039 **Supplementary Table 1: Cryo-EM statistics**

|                                                    | FPN-Fab45D8<br>(EMDB-21539)<br>(PDB 6W4S)                   | FPN-Co <sup>2+</sup> -hepcidin-Fab45D8<br>(EMDB-21599)<br>(PDB 6WBV) |
|----------------------------------------------------|-------------------------------------------------------------|----------------------------------------------------------------------|
| <b>Data collection and processing</b>              |                                                             |                                                                      |
| Microscope/Detector                                | Titan Krios/Gatan K3 with Gatan<br>Bioquantum Energy Filter | Titan Krios/Gatan K3 with Gatan<br>Bioquantum Energy Filter          |
| Imaging software and collection                    | SerialEM, 3x3 image shift                                   | Serial EM, 3x3 image shift                                           |
| Magnification                                      | 105,000                                                     | 105,000                                                              |
| Voltage (kV)                                       | 300                                                         | 300                                                                  |
| Electron exposure (e-/Å <sup>2</sup> )             | 66                                                          | 66                                                                   |
| Dose rate (e-/pix/sec)                             | 8                                                           | 8                                                                    |
| Frame exposure (e-/Å <sup>2</sup> )                | 0.55                                                        | 0.55                                                                 |
| Defocus range (µm)                                 | -0.8 to -2.0                                                | -0.8 to -2.0                                                         |
| Pixel size (Å)                                     | 0.834 (physical)                                            | 0.834 (physical)                                                     |
| Micrographs                                        | 5,415                                                       | 4,395                                                                |
| <b>Reconstruction</b>                              |                                                             |                                                                      |
| Autopicked particles (template-based in cryosparc) | 4,737,795                                                   | 3,753,516                                                            |
| Particles in 3D classification                     | 1,326,130 (RELION)                                          | 1,263,513 (cryosparc)                                                |
| Particles in final refinement                      | 308,386 (cisTEM)                                            | 310,647 (cisTEM)                                                     |
| Symmetry imposed                                   | C1                                                          | C1                                                                   |
| Map sharpening <i>B</i> factor (Å <sup>2</sup> )   | -130                                                        | -90                                                                  |
| Map resolution, global FSC (Å)                     |                                                             |                                                                      |
| FSC 0.5, unmasked/masked                           | 7.1/3.4                                                     | 4.0/2.7                                                              |
| FSC 0.143, unmasked/masked                         | 4.0/3.2                                                     | 3.3/2.5                                                              |
| <b>Refinement</b>                                  |                                                             |                                                                      |
| Initial model used (PDB code)                      | 5AYN                                                        | 5AYN, 3H0T                                                           |
| Model resolution (Å)                               |                                                             |                                                                      |
| FSC 0.5, unmasked/masked                           | 3.6/3.4                                                     | 3.0/2.8                                                              |
| Model composition                                  |                                                             |                                                                      |
| Non-hydrogen atoms                                 | 4968                                                        | 6869                                                                 |
| Protein residues                                   | 650                                                         | 892                                                                  |
| <i>B</i> factors (Å <sup>2</sup> )                 |                                                             |                                                                      |
| Protein                                            | 67.31                                                       | 27.30                                                                |
| Ligand                                             | N/A                                                         | 55.15                                                                |
| Water                                              | N/A                                                         | 31.32                                                                |
| R.m.s. deviations                                  |                                                             |                                                                      |
| Bond lengths (Å)                                   | 0.004                                                       | 0.006                                                                |
| Bond angles (°)                                    | 0.563                                                       | 0.872                                                                |
| Validation                                         |                                                             |                                                                      |
| MolProbity score                                   | 2.31                                                        | 2.10                                                                 |
| Clashscore                                         | 7.90                                                        | 7.10                                                                 |
| Poor rotamers (%)                                  | 4.45                                                        | 4.26                                                                 |
| EMRinger score                                     | 2.37                                                        | 4.32                                                                 |
| CaBLAM score                                       | 2.06                                                        | 0.69                                                                 |
| Ramachandran plot                                  |                                                             |                                                                      |
| Favored (%)                                        | 94.38                                                       | 96.47                                                                |
| Allowed (%)                                        | 5.62                                                        | 3.53                                                                 |
| Disallowed (%)                                     | 0                                                           | 0                                                                    |

1041

1042

1043 **Supplementary Table 2: Fab45D8 crystal structure statistics**

1044

|                                         | Fab45D8<br>(PDB 6W4V)                   |
|-----------------------------------------|-----------------------------------------|
| <b>Data collection</b>                  |                                         |
| Space group                             | $P2_1$                                  |
| Cell dimensions                         |                                         |
| <i>a</i> , <i>b</i> , <i>c</i> (Å)      | 72.19, 36.43, 84.95                     |
| $\alpha$ , $\beta$ , $\gamma$ (°)       | 90.0, 112.26, 90.0                      |
| Resolution (Å)                          | 39.31 - 2.09 (2.14 - 2.09) <sup>a</sup> |
| $R_{\text{sym}}$ or $R_{\text{merge}}$  | 0.087 (1.385)                           |
| $I / \sigma I$                          | 7.9 (1.2)                               |
| Completeness (%)                        | 99.9 (99.9)                             |
| Redundancy                              | 3.3 (3.5)                               |
| CC (1/2) (%)                            | 99.6 (30.0)                             |
| <b>Refinement</b>                       |                                         |
| Resolution (Å)                          | 39.31 - 2.09                            |
| No. reflections                         | 24736                                   |
| $R_{\text{work}} / R_{\text{free}}$ (%) | 21.6 / 24.7                             |
| No. atoms                               |                                         |
| Protein                                 | 3356                                    |
| Ligand/ion                              | 20                                      |
| Water                                   | 125                                     |
| <i>B</i> -factors                       |                                         |
| Protein                                 | 57.87                                   |
| Ligand/ion                              | 86.17                                   |
| Water                                   | 51.43                                   |
| R.m.s. deviations                       |                                         |
| Bond lengths (Å)                        | 0.01                                    |
| Bond angles (°)                         | 0.92                                    |

<sup>a</sup>Values in parentheses are for highest-resolution shell.

1046

1047 **Supplementary Table 3: Molecular dynamics simulations**

1048

| <b>Condition</b>     | <b>Number of Simulations</b> | <b>Duration (<math>\mu</math>s)</b> | <b>Notes</b>                                                                    |
|----------------------|------------------------------|-------------------------------------|---------------------------------------------------------------------------------|
| Iron absent          | 6                            | 2.2 (each)                          | No iron was added                                                               |
| Iron bound           | 6                            | 2.2 (each)                          | A single Fe <sup>2+</sup> ion was placed in the proposed binding site initially |
| Iron in bulk solvent | 6                            | 2.2 (each)                          | 15 Fe <sup>2+</sup> ions were placed randomly in solution initially             |

1049

1050
